# Supplementary material for: Detection of fungicide resistance to fludioxonil and tebuconazole in Fusarium pseudograminearum, the causal agent of Fusarium crown rot in wheat
Source: PeerJ. 2023 Jan 26;11:e14705. doi: 10.7717/peerj.14705 (PMC9884474; doi:10.7717/peerj.14705)
Supplement: Supplemental Information 1 [file peerj-11-14705-s001.xlsx]

## Sheet: Fludioxonil 
L1	L2	L3	F1	F2	F3	L	F	编号	浓度	L	F	平均	抑制率	几率值	浓度对数	a	b	x	EC50	相关系数r	r2
0.7	0.8	0.6	0.7	0.7	0.7	0.7	0.7	1	0.48	0.7	0.7	0.2	97.4194	6.94635	-0.318759	7.24342	1.41633	-1.58397	0.0260632	0.972431	0.945623
1.4	1.5	1.3	1.6	1.6	1.3	1.4	1.5		0.24	1.4	1.5	0.95	87.7419	6.16218	-0.619789
1.7	1.8	1.8	1.9	1.8	1.7	1.76667	1.8		0.12	1.8	1.8	1.3	83.2258	5.96313	-0.920819
3.5	3.4	3.1	3.2	3.3	3.5	3.33333	3.33333		0.06	3.3	3.3	2.8	63.871	5.35501	-1.22185
3.4	3.3	3	3.1	3.4	3.5	3.23333	3.33333		0.03	3.2	3.3	2.75	64.5161	5.37229	-1.52288
5.5	5.8	5.7	5.6	5.6	5.9	5.66667	5.7		0.015	5.7	5.7	5.2	32.9032	4.55741	-1.82391
8.2	8.2	8.1	8.2	8.3	8.3	8.16667	8.26667		CK	8.2	8.3	7.75	0	#NUM!	#VALUE!
0.7	0.8	0.6	0.9	0.7	0.8	0.7	0.8	4	0.48	0.7	0.8	0.25	96.7742	6.8486	-0.318759	7.21373	1.40824	-1.57199	0.0267926	0.990713	0.981513
1.4	1.2	1.2	1.5	1.4	1.1	1.26667	1.33333		0.24	1.3	1.3	0.8	89.6774	6.26338	-0.619789
2.2	1.9	2	1.9	2.2	1.8	2.03333	1.96667		0.12	2	2	1.5	80.6452	5.86489	-0.920819
2.9	3.3	3.2	3	3.2	3.1	3.13333	3.1		0.06	3.1	3.1	2.6	66.4516	5.42482	-1.22185
3.5	3.6	3.8	3.6	3.4	3.7	3.63333	3.56667		0.03	3.6	3.6	3.1	60	5.25335	-1.52288
5.8	5.6	5.7	5,7	5.6	5.5	5.7	5.55		0.015	5.7	5.6	5.15	33.5484	4.57518	-1.82391
8.3	8.3	8.3	8.1	8.1	8.3	8.3	8.16667		CK	8.3	8.2	7.75	0	#NUM!	#VALUE!
0.8	0.6	0.7	0.7	0.7	0.7	0.7	0.7	6	2	0.71	0.7	0.005	99.918	8.14881	0.30103	7.22666	1.67468	-1.3296	0.0468162	0.958351	0.918436
0.9	0.9	1.1	0.8	0.75	0.7	0.966667	0.75		1	1	0.75	0.175	97.1311	6.90043	0
1.2	1.4	1.2	1	1.4	1	1.26667	1.13333		0.48	1.3	1.1	0.5	91.8033	6.39196	-0.318759
1.3	1.5	1.2	1.5	1.7	1.5	1.33333	1.56667		0.24	1.3	1.6	0.75	87.7049	6.16036	-0.619789
2	2	1.8	1.9	1.9	1.9	1.91667	1.9		0.12	1.9	1.9	1.2	80.3279	5.85339	-0.920819
3.3	3	3.15	3.1	3.15	3.2	3.15	3.15		0.06	3.15	3.15	2.45	59.8361	5.24911	-1.22185
6.6	6.7	6.7	7	7	6.8	6.66667	6.93333		CK	6.7	6.9	6.1	0	#NUM!	#VALUE!
1.3	1	1.3	0.9	0.8	0.8	1.2	0.833333	11	2	1.2	0.8	0.3	94.4954	6.59778	0.30103	6.17288	1.37693	-0.851803	0.140669	0.966656	0.934423
1.7	1.5	1.8	1.5	1.6	1.5	1.66667	1.53333		1	1.7	1.5	0.9	83.4862	5.97356	0
1.8	2.2	1.8	2.1	2.2	1.8	1.93333	2.03333		0.48	1.9	2	1.25	77.0642	5.74096	-0.318759
2.3	2.2	2	2.2	2.3	2.2	2.16667	2.23333		0.24	2.2	2.15	1.475	72.9358	5.61087	-0.619789
3.2	3.3	3.3	3.4	3	3.4	3.26667	3.26667		0.12	3.3	3.3	2.6	52.2936	5.05752	-0.920819
5	5.2	4.9	5	4.8	5	5.03333	4.93333		0.06	5	4.9	4.25	22.0183	4.22843	-1.22185
6.5	6.6	6.5	5.8	5.9	5.7	6.53333	5.8		CK	6.5	5.8	5.45	0	#NUM!	#VALUE!
0.9	0.8	1	0.8	0.7	0.9	0.9	0.8	13	2	0.9	0.8	0.15	97.619	6.98075	0.30103	6.62955	1.08945	-1.49576	0.0319331	0.985416	0.971044
1	1.1	1	1.1	1	1	1.03333	1.03333		1	1	1	0.3	95.2381	6.66839	0
1.8	1.7	1.6	1.5	1.3	1.4	1.7	1.4		0.48	1.7	1.4	0.85	86.5079	6.10343	-0.318759
1.9	1.7	1.7	1.2	1.2	1.4	1.76667	1.26667		0.24	1.8	1.3	0.85	86.5079	6.10343	-0.619789
2.5	2.6	2.5	2.5	2.4	2.2	2.53333	2.36667		0.12	2.5	2.4	1.75	72.2222	5.58946	-0.920819
3	3	3.2	3.2	3	3.1	3.06667	3.1		0.06	3.1	3.1	2.4	61.9048	5.30298	-1.22185
7.2	7.3	7	6.7	6.9	6.9	7.16667	6.83333		CK	7.2	6.8	6.3	0	#NUM!	#VALUE!
0.7	0.8	0.7	0.6	0.9	0.6	0.716667	0.7	14	2	0.71	0.71	0.01	99.8246	7.91925	0.30103	7.14984	1.90066	-1.1311	0.073943	0.967538	0.93613
0.8	0.8	0.9	0.7	0.7	0.6	0.833333	0.666667		1	0.8	0.71	0.055	99.0351	7.33972	0
1.5	1.7	1.6	1.4	1.1	1.3	1.6	1.26667		0.48	1.6	1.3	0.75	86.8421	6.11896	-0.318759
2	2.2	2	2	2	1.8	2.06667	1.93333		0.24	2.1	1.9	1.3	77.193	5.74522	-0.619789
2.7	2.9	2.9	2.6	2.7	2.7	2.83333	2.66667		0.12	2.8	2.7	2.05	64.0351	5.3594	-0.920819
3.1	3.3	3.1	3.3	3.2	3.4	3.16667	3.3		0.06	3.2	3.3	2.55	55.2632	5.13231	-1.22185
6.6	6.4	6.5	6.4	6.3	6.1	6.5	6.26667		CK	6.5	6.3	5.7	0	#NUM!	#VALUE!
1.4	1.4	1.5	1.2	1.4	1.3	1.43333	1.3	15	2	1.4	1.3	0.65	86.4583	6.10115	0.30103	5.93367	0.756307	-1.23451	0.0582756	0.964631	0.930514
1.6	1.4	1.4	1.7	1.7	1.6	1.46667	1.66667		1	1.5	1.7	0.9	81.25	5.88715	0
1.5	1.7	`1.8	1.5	1.5	1.6	1.6	1.53333		0.48	1.6	1.5	0.85	82.2917	5.92654	-0.318759
2.6	2.7	2.6	2.1	2.3	2.1	2.63333	2.16667		0.24	2.6	2.2	1.7	64.5833	5.3741	-0.619789
2.6	2.7	2.7	2.6	2.8	2.7	2.66667	2.7		0.12	2.7	2.7	2	58.3333	5.21043	-0.920819
3.1	3.1	3.3	3	3	3	3.16667	3		0.06	3.2	3	2.4	50	5	-1.22185
5.5	5.5	5.5	5.5	5.4	5.5	5.5	5.46667		CK	5.5	5.5	4.8	0	#NUM!	#VALUE!
0.7	0.6	0.7	0.7	0.7	0.7	0.675	0.7	17	2	0.71	0.71	0.01	99.7403	7.7947	0.30103	7.17063	1.60157	-1.35531	0.0441252	0.989145	0.978409
0.7	0.9	0.9	0.8	0.7	0.7	0.783333	0.733333		1	0.8	0.71	0.055	98.5714	7.18935	0
1	1.1	1.1	0.8	0.9	1	1.06667	0.9		0.48	1.1	0.9	0.3	92.2078	6.41919	-0.318759
1.3	1.2	1.2	1.2	1.2	1.1	1.23333	1.16667		0.24	1.2	1.2	0.5	87.013	6.12701	-0.619789
1.5	1.5	1.8	1.7	1.6	1.5	1.6	1.6		0.12	1.6	1.6	0.9	76.6234	5.7265	-0.920819
2	2.3	2.2	2.1	2.1	2	2.16667	2.06667		0.06	2.2	2.1	1.45	62.3377	5.31436	-1.22185
4.8	4.6	4.8	4.2	4.5	4.5	4.73333	4.4		CK	4.7	4.4	3.85	0	#NUM!	#VALUE!
1.5	1.5	1.5	1	1.1	1	1.5	1.03333	18	0.48	1.54	1	0.57	90.2564	6.2963	-0.318759	6.73691	1.48073	-1.17301	0.0671417	0.98607	0.972335
2	2	2.2	2.3	2.4	2.4	2.06667	2.36667		0.24	2.1	2.4	1.55	73.5043	5.62814	-0.619789
2.4	2.4	2.4	2.4	2.3	2.5	2.4	2.4		0.12	2.4	2.4	1.7	70.9402	5.55164	-0.920819
3.6	3.7	3.8	3.4	3.4	3.5	3.7	3.43333		0.06	3.7	3.4	2.85	51.2821	5.03214	-1.22185
5.1	5.1	5.2	4.9	4.9	5.1	5.05	4.96667		0.03	5.1	5	4.35	25.641	4.34555	-1.52288
5.5	5.7	5.5	5.5	5.4	5.6	5.56667	5.5		0.015	5.6	5.5	4.85	17.094	4.04954	-1.82391
6.5	6.4	6.4	6.7	6.8	6.6	6.43333	6.7		CK	6.4	6.7	5.85	0	#NUM!	#VALUE!
0.5	0.6	0.5	0.5	0.5	0.5	0.533333	0.5	22	0.48	0.51	0.5	0.005	99.9296	8.19291	-0.318759	8.4695	2.29245	-1.51345	0.0306586	0.968131	0.937278
0.8	0.8	0.6	0.7	0.6	0.8	0.733333	0.7		0.24	0.7	0.7	0.2	97.1831	6.90841	-0.619789
1.8	1.9	1.8	1.8	1.8	1.7	1.83333	1.76667		0.12	1.8	1.8	1.3	81.6901	5.90362	-0.920819
2.7	2.7	2.7	2.7	2.9	2.7	2.7	2.76667		0.06	2.7	2.8	2.25	68.3099	5.47638	-1.22185
3.9	4	4	4.1	4	4	3.96667	4.03333		0.03	4	4	3.5	50.7042	5.01765	-1.52288
5	5	5.2	5.2	5.3	5.3	5.06667	5.26667		0.015	5.1	5.3	4.7	33.8028	4.58215	-1.82391
7.6	7.6	7.4	7.7	7.7	7.8	7.53333	7.73333		CK	7.5	7.7	7.1	0
1.6	1.7	1.7	1.1	1.2	1.2	1.66667	1.16667	23	2	1.7	1.2	0.75	90.3846	6.30378	0.30103	6.11415	0.757423	-1.47097	0.0338088	0.980364	0.961113
1.7	1.7	1.8	1.9	1.6	1.8	1.73333	1.76667		1	1.7	1.8	1.05	86.5385	6.10484	0
2.2	2.1	2.2	2.2	2.3	2.3	2.16667	2.26667		0.48	2.2	2.3	1.55	80.1282	5.84621	-0.318759
2.6	2.8	2.8	2.1	2.3	2.1	2.73333	2.16667		0.24	2.7	2.2	1.75	77.5641	5.75755	-0.619789
3.3	3.3	3.4	3	2.8	3	3.33333	2.93333		0.12	3.3	2.9	2.4	69.2308	5.5024	-0.920819
4.5	4.6	4.7	4.2	4.2	4.3	4.6	4.23333		0.06	4.6	4.2	3.7	52.5641	5.06432	-1.22185
8.5	8.6	8.8	8.5	8.4	8.4	8.63333	8.43333		CK	8.6	8.4	7.8	0	#NUM!	#VALUE!
0.9	0.8	0.8	0.82	0.8	0.81	0.833333	0.81	24	0.48	0.8	0.8	0.3	95.9184	6.74129	-0.318759	7.32635	1.67645	-1.38767	0.0409575	0.996511	0.993033
1.3	1.3	1.2	1.3	1.2	1.2	1.26667	1.23333		0.24	1.3	1.2	0.75	89.7959	6.27001	-0.619789
2	1.9	1.9	1.9	1.8	2	1.93333	1.9		0.12	1.9	1.9	1.4	80.9524	5.87614	-0.920819
3.5	3.5	3.5	3.5	3.5	3.2	3.5	3.4		0.06	3.5	3.4	2.95	59.8639	5.24983	-1.22185
4.7	4.5	4.4	4.5	4.5	4.7	4.53333	4.56667		0.03	4.5	4.6	4.05	44.898	4.87176	-1.52288
6.2	6.3	6.3	6.3	6.4	6.5	6.26667	6.4		0.015	6.3	6.4	5.85	20.4082	4.17287	-1.82391
7.9	7.9	7.5	8	7.7	7.9	7.76667	7.86667		CK	7.8	7.9	7.35	0
1	1	1	1	1.2	1	1	1.06667	26	0.48	1	1.1	0.55	92.9487	6.47198	-0.318759	6.91284	1.34059	-1.42687	0.0374224	0.99407	0.988176
1.6	1.7	1.6	1.6	1.8	1.7	1.63333	1.7		0.24	1.6	1.7	1.15	85.2564	6.04749	-0.619789
2	2.1	2	2.2	2.2	2.4	2.03333	2.26667		0.12	2	2.3	1.65	78.8462	5.80109	-0.920819
3.9	4.1	4.2	4	3.8	3.6	4.06667	3.8		0.06	4	3.8	3.4	56.4103	5.16138	-1.22185
4.5	4.6	4.3	4.6	4.6	4.9	4.46667	4.7		0.03	4.5	4.7	4.1	47.4359	4.93568	-1.52288
6	6.1	6	6.1	6.1	6.1	6.03333	6.1		0.015	6	6.1	5.55	28.8462	4.44212	-1.82391
8.3	8.3	8.3	8.4	8.3	8.3	8.3	8.33333		CK	8.3	8.3	7.8	0	#NUM!	#VALUE!
1.8	1.6	1.7	1.6	1.6	1.7	1.7	1.63333	27	0.48	1.7	1.6	0.95	84.1667	6.00133	-0.318759	6.37439	1.23702	-1.11105	0.0774371	0.96842	0.937837
2.7	2.5	2.4	2.5	2.6	2.5	2.53333	2.53333		0.24	2.5	2.5	1.8	70	5.5244	-0.619789
3.6	3.4	3.5	3.1	3.4	3.3	3.5	3.26667		0.12	3.5	3.3	2.7	55	5.12566	-0.920819
3.1	3.4	3.2	3.2	3.1	3.2	3.23333	3.16667		0.06	3.2	3.2	2.5	58.3333	5.21043	-1.22185
5	5	5.2	5.1	5.2	5.2	5.06667	5.16667		0.03	5.1	5.2	4.45	25.8333	4.35151	-1.52288
5.5	5.6	5.6	5.8	5.7	5.6	5.56667	5.7		0.015	5.6	5.65	4.925	17.9167	4.08145	-1.82391
6.8	6.8	6.7	6.5	6.6	6.7	6.76667	6.6		CK	6.8	6.6	6	0	#NUM!	#VALUE!
1.4	1.4	1.3	1.3	1.3	1.3	1.36667	1.3	29	0.48	1.4	1.3	0.85	87.6812	6.15919	-0.318759	6.83799	1.41305	-1.30073	0.0500347	0.974762	0.950162
1.6	1.5	1.5	1.8	1.8	1.6	1.53333	1.73333		0.24	1.5	1.7	1.1	84.058	5.99684	-0.619789
2.1	2	2	2	1.9	1.9	2.03333	1.93333		0.12	2	1.9	1.45	78.9855	5.80592	-0.920819
3.1	3.2	3.3	3.4	3.4	3.3	3.2	3.36667		0.06	3.2	3.4	2.8	59.4203	5.23837	-1.22185
5	4.9	4.8	5.1	4.9	5	4.9	5		0.03	4.9	5	4.45	35.5072	4.62834	-1.52288
6	6.1	6.1	6.2	6	6.1	6.06667	6.1		0.015	6.1	6.1	5.6	18.8406	4.11621	-1.82391
7.3	7.2	7.3	7.5	7.5	7.4	7.26667	7.46667		CK	7.3	7.5	6.9	0
0.7	0.7	0.8	0.8	0.6	0.7	0.733333	0.7	31	2	0.71	0.71	0.01	99.7605	7.8208	0.30103	6.68323	2.25186	-0.747485	0.178861	0.971593	0.943994
1.3	1.3	1.3	1	1.1	1	1.3	1.03333		1	1.3	1	0.45	89.2216	6.2384	0
1.8	1.7	1.8	1.2	1.3	1.3	1.76667	1.26667		0.48	1.75	1.25	0.8	80.8383	5.87195	-0.318759
2.8	2.9	2.6	2.5	2.4	2.5	2.76667	2.46667		0.24	2.75	2.5	1.925	53.8922	5.09772	-0.619789
3.4	3.4	3.5	3.1	3	3	3.43333	3.03333		0.12	3.4	3	2.5	40.1198	4.74975	-0.920819
4.2	4.2	4.2	4	4.1	4.1	4.2	4.06667		0.06	4.2	4.1	3.45	17.3653	4.06017	-1.22185
7.4	7.3	7.5	2.4	2.4	2.3	7.4	2.36667		CK	7.35	2.4	4.175	0	#NUM!	#VALUE!
1.5	1.5	1.5	1	0.9	0.9	1.5	0.933333	32	0.48	1.5	0.9	0.5	91.9355	6.40075	-0.318759	6.85731	1.43915	-1.29056	0.0512199	0.9943	0.988632
1.9	1.9	1.8	1.9	2	1.9	1.86667	1.93333		0.24	1.9	1.9	1.2	80.6452	5.86489	-0.619789
2.2	2.1	2.2	2.2	2.3	2.3	2.16667	2.26667		0.12	2.2	2.3	1.55	75	5.67449	-0.920819
3.7	3.4	3.4	3.5	3.5	3.4	3.5	3.46667		0.06	3.5	3.5	2.8	54.8387	5.12159	-1.22185
4.9	4.8	4.7	4.8	4.8	4.8	4.8	4.8		0.03	4.8	4.8	4.1	33.871	4.58401	-1.52288
5.6	5.3	5.4	5.6	5.6	5.7	5.43333	5.63333		0.015	5.4	5.6	4.8	22.5806	4.24727	-1.82391
6.9	7	7	7	6.6	6.7	6.96667	6.76667		CK	7	6.8	6.2	0	#NUM!	#VALUE!
1	1	0.7	0.8	0.8	0.8	0.9	0.8	33	2	0.9	0.8	0.15	97.6562	6.98743	0.30103	6.6923	1.2248	-1.3817	0.0415243	0.961406	0.924302
1.1	1.2	1.2	1	0.9	0.9	1.16667	0.933333		1	1.2	0.9	0.35	94.5312	6.60101	0
1.2	1.2	1.1	0.9	0.7	0.9	1.16667	0.833333		0.48	1.2	0.8	0.3	95.3125	6.67594	-0.318759
2.3	2.3	2.2	2.1	2	2.1	2.26667	2.06667		0.24	2.3	2.1	1.5	76.5625	5.72451	-0.619789
2.3	2.3	2.4	2.7	2.5	2.7	2.33333	2.63333		0.12	2.3	2.6	1.75	72.6562	5.60245	-0.920819
3.5	3.7	3.4	3.5	3.6	3.5	3.53333	3.53333		0.06	3.5	3.5	2.8	56.25	5.15731	-1.22185
7.1	7.1	7.3	7.1	7	7	7.16667	7.03333		CK	7.2	7	6.4	0	#NUM!	#VALUE!
1.1	1.2	1.3	1	1.1	1.1	1.2	1.06667	34	2	1.15	1.05	0.4	93.9623	6.55161	0.30103	6.36682	1.01615	-1.3451	0.0451754	0.957293	0.916409
1.4	1.4	1.3	1.3	1.3	1.3	1.36667	1.3		1	1.35	1.3	0.625	90.566	6.3145	0
2.2	2.1	2.1	1	1	0.9	2.13333	0.966667		0.48	2.15	1	0.875	86.7925	6.11663	-0.318759
1.9	2	1.9	1.7	1.6	1.5	1.93333	1.6		0.24	1.85	1.6	1.025	84.5283	6.01641	-0.619789
3	2.7	2.8	2.8	2.8	2.9	2.83333	2.83333		0.12	2.8	2.8	2.1	68.3019	5.47616	-0.920819
4.2	4.1	4.2	4.4	4.4	4.5	4.16667	4.43333		0.06	4.15	4.4	3.575	46.0377	4.90052	-1.22185
7.5	7.3	7.4	7.3	7.5	7.1	7.4	7.3		CK	7.4	7.25	6.625	0	#NUM!	#VALUE!
0.8	0.6	0.7	0.8	0.6	0.9	0.7	0.766667	37	0.48	0.7	0.8	0.25	96.7949	6.85147	-0.318759	7.39581	1.61126	-1.48691	0.0325904	0.98576	0.971723
1	1	1	0.9	1	1	1	0.966667		0.24	1	1	0.5	93.5897	6.52122	-0.619789
1.9	1.8	1.6	1.7	1.7	1.8	1.76667	1.73333		0.12	1.8	1.7	1.25	83.9744	5.9934	-0.920819
3.9	4	4.2	3.8	3.9	4	4.03333	3.9		0.06	4	3.9	3.45	55.7692	5.14512	-1.22185
4.8	4.8	4.5	4.6	4.8	4.5	4.7	4.63333		0.03	4.7	4.6	4.15	46.7949	4.91957	-1.52288
5.5	5.9	5.7	5.6	5.6	5.6	5.7	5.6		0.015	5.7	5.6	5.15	33.9744	4.58684	-1.82391
8.4	8.1	8.3	8.4	8.4	8	8.26667	8.26667		CK	8.3	8.3	7.8	0	#NUM!	#VALUE!
0.9	0.9	0.9	1	0.7	0.7	0.9	0.8	35	0.48	0.9	0.8	0.35	94.6565	6.61242	-0.318759	6.95042	1.25723	-1.55136	0.0280955	0.973698	0.948088
1.5	1.7	1.7	1.4	1.5	1.3	1.63333	1.4		0.24	1.6	1.4	1	84.7328	6.02504	-0.619789
1.6	1.6	1.6	1.7	1.6	1.5	1.6	1.6		0.12	1.6	1.6	1.1	83.2061	5.96234	-0.920819
3.1	3	3.4	3.3	3.2	3.5	3.16667	3.33333		0.06	3.2	3.3	2.75	58.0153	5.20228	-1.22185
3.2	3.3	3.1	3.1	3	3.4	3.2	3.16667		0.03	3.2	3.2	2.7	58.7786	5.22185	-1.52288
5	4.8	4.7	4.8	4.8	4.9	4.83333	4.83333		0.015	4.8	4.8	4.3	34.3511	4.5971	-1.82391
7	7.2	7.2	7	7.2	6.8	7.13333	7		CK	7.1	7	6.55	0
0.7	0.8	0.7	0.7	0.9	0.6	0.733333	0.733333	36	0.48	0.71	0.71	0.01	99.8291	7.92734	-0.318759	8.0359	2.2495	-1.34959	0.0447106	0.9528	0.907828
1.5	1.4	1.6	1.5	1.7	1.4	1.5	1.53333		0.24	1.5	1.5	0.8	86.3248	6.09503	-0.619789
2.3	2.3	2.3	2.4	2.1	2.1	2.3	2.2		0.12	2.3	2.2	1.55	73.5043	5.62814	-0.920819
3	3.1	2.8	2.8	3	2.7	2.96667	2.83333		0.06	3	2.8	2.2	62.3932	5.31582	-1.22185
4.6	4.2	4.3	4.1	4.1	4.3	4.36667	4.16667		0.03	4.4	4.2	3.6	38.4615	4.70662	-1.52288
5.8	5.4	5.5	5.4	5.4	5.4	5.56667	5.4		0.015	5.6	5.4	4.8	17.9487	4.08268	-1.82391
6.8	6.5	6.8	6.4	6.2	6.7	6.7	6.43333		CK	6.7	6.4	5.85	0	#NUM!	#VALUE!
0.9	1.2	1	0.8	0.6	0.7	1.03333	0.7	38	2	1	0.7	0.15	97.8799	7.02954	0.30103	6.58177	1.19477	-1.32391	0.047434	0.981643	0.963623
1.3	1.2	1.5	1	1	1.1	1.33333	1.03333		1	1.3	1	0.45	93.6396	6.5252	0
2.2	2	1.9	1.3	1.4	1.2	2.03333	1.3		0.48	2	1.3	0.95	86.5724	6.10641	-0.318759
1.9	1.9	1.9	2	1.9	1.9	1.9	1.93333		0.24	1.85	1.9	1.175	83.3922	5.96978	-0.619789
3.3	3.4	3.2	3.7	3.7	3.5	3.3	3.63333		0.12	3.25	3.6	2.725	61.4841	5.29196	-0.920819
3.6	3.7	3.4	3.4	3.5	3.6	3.56667	3.5		0.06	3.6	3.5	2.85	59.7173	5.24604	-1.22185
8	7.6	7.7	7.8	7.8	7.7	7.76667	7.76667		CK	7.75	7.8	7.075	0	#NUM!	#VALUE!
0.8	0.8	1.1	0.9	0.9	0.9	0.9	0.9	39	2	0.9	0.9	0.2	94.4444	6.59322	0.30103	6.26313	1.17707	-1.07311	0.0845055	0.999597	0.999195
1	1	1.2	1	1	1	1.06667	1		1	1.1	1	0.35	90.2778	6.29754	0
1.5	1.3	1.4	1.3	1.4	1.4	1.4	1.36667		0.48	1.4	1.35	0.675	81.25	5.88715	-0.318759
1.9	1.7	1.7	2	1.7	1.6	1.76667	1.76667		0.24	1.8	1.75	1.075	70.1389	5.5284	-0.619789
2.4	2.2	2.3	2.3	2.1	2.1	2.3	2.16667		0.12	2.3	2.2	1.55	56.9444	5.17496	-0.920819
3.1	3	2.7	2.7	2.9	2.3	2.93333	2.63333		0.06	2.9	2.6	2.05	43.0556	4.82504	-1.22185
4.7	4.4	4.3	4.1	4	4.1	4.46667	4.06667		CK	4.5	4.1	3.6	0	#NUM!	#VALUE!
0.8	0.6	0.4	0.6	0.7	0.6	0.6	0.633333	40	0.48	0.6	0.6	0.1	98.7179	7.23161	-0.318759	7.65666	1.80359	-1.47298	0.0336528	0.982289	0.964891
1.3	1.3	1.1	1.3	1.1	1	1.23333	1.13333		0.24	1.2	1.1	0.65	91.6667	6.38299	-0.619789
1.8	1.7	1.9	1.7	1.7	1.7	1.75	1.7		0.12	1.8	1.7	1.25	83.9744	5.9934	-0.920819
3.4	3.5	3.8	3.5	3.7	3.8	3.56667	3.66667		0.06	3.6	3.7	3.15	59.6154	5.2434	-1.22185
3.7	3.5	3.4	4.1	4	3.9	3.53333	4		0.03	3.5	4	3.25	58.3333	5.21043	-1.52288
6.6	6.4	6.3	6.3	6.3	6.9	6.43333	6.5		0.015	6.4	6.5	5.95	23.7179	4.2846	-1.82391
8.6	8.3	8.1	8.4	8.5	8.1	8.33333	8.33333		CK	8.3	8.3	7.8	0	#NUM!	#VALUE!
0.7	0.5	0.8	0.7	0.9	0.6	0.666667	0.733333	43	0.48	0.7	0.7	0.2	97.2789	6.92346	-0.318759	7.38584	1.61483	-1.47745	0.0333078	0.983296	0.966871
1.3	1.6	1.1	1	1.2	1.4	1.33333	1.2		0.24	1.3	1.2	0.75	89.7959	6.27001	-0.619789
1.7	1.4	1.9	1.8	1.6	1.9	1.66667	1.76667		0.12	1.7	1.8	1.25	82.9932	5.9539	-0.920819
3.1	3.1	3.3	3.2	3.6	3.8	3.16667	3.53333		0.06	3.2	3.5	2.85	61.2245	5.28517	-1.22185
3.7	3.3	3.2	3.6	3.7	3.8	3.4	3.7		0.03	3.4	3.7	3.05	58.5034	5.21479	-1.52288
6	5.9	6.3	6.1	6.4	5.9	6.06667	6.13333		0.015	6.1	6.1	5.6	23.8095	4.28756	-1.82391
8	7.4	7.9	8	8.1	7.6	7.76667	7.9		CK	7.8	7.9	7.35	0	#NUM!	#VALUE!
1	0.6	0.6	0.7	0.9	0.5	0.733333	0.7	54	2	0.71	0.7	0.005	99.918	8.14881	0.30103	7.5262	2.15454	-1.1725	0.0672203	0.941911	0.887197
0.8	0.7	0.7	0.6	0.8	0.7	0.733333	0.7		1	0.71	0.7	0.005	99.918	8.14881	0
1.3	1.2	1.4	1.5	1.2	1.3	1.3	1.33333		0.48	1.25	1.25	0.55	90.9836	6.33975	-0.318759
2.1	2	1.9	2.3	2.1	2	2	2.13333		0.24	2	2.1	1.35	77.8689	5.76777	-0.619789
2.8	2.5	2.6	2.4	2.7	2.8	2.63333	2.63333		0.12	2.6	2.6	1.9	68.8525	5.49167	-0.920819
3	3.1	3.2	3.1	3	3.1	3.1	3.06667		0.06	3.1	3.1	2.4	60.6557	5.27036	-1.22185
6.6	6.8	6.9	6.9	7	6.5	6.76667	6.8		CK	6.8	6.8	6.1	0	#NUM!	#VALUE!
1	0.7	0.6	0.5	0.7	0.8	0.766667	0.666667	55	0.48	0.8	0.7	0.25	96.0938	6.76167	-0.318759	7.2261	1.63321	-1.36302	0.0433488	0.988285	0.976707
1.4	1.4	1.2	1.4	1.3	1	1.33333	1.23333		0.24	1.3	1.2	0.75	88.2812	6.18916	-0.619789
2.7	2.4	2.2	2.1	2.4	2.5	2.43333	2.33333		0.12	2.4	2.3	1.85	71.0938	5.55613	-0.920819
2.9	2.9	3.3	3.1	3	2.8	3.03333	2.96667		0.06	3	3	2.5	60.9375	5.27769	-1.22185
4	3.9	3.7	3.5	3.7	3.8	3.86667	3.66667		0.03	3.9	3.7	3.3	48.4375	4.96082	-1.52288
5.7	5.9	5.6	5.5	5.8	5.9	5.73333	5.73333		0.015	5.7	5.7	5.2	18.75	4.11285	-1.82391
7	7.2	6.9	6.8	7	6.7	7.03333	6.83333		CK	7	6.8	6.4	0	#NUM!	#VALUE!
0.9	0.8	1.2	0.9	0.7	0.6	0.966667	0.733333	56	2	1	0.7	0.15	97.561	6.97051	0.30103	6.43236	1.26817	-1.12947	0.0742213	0.952669	0.907579
1.2	1.5	1	1	0.7	0.9	1.23333	0.866667		1	1.2	0.9	0.35	94.3089	6.58125	0
2.9	2.5	2.4	2.1	2.3	2.1	2.6	2.16667		0.48	2.6	2.2	1.7	72.3577	5.5935	-0.318759
2.2	2.6	2.5	2.5	2.5	2.3	2.43333	2.43333		0.24	2.4	2.4	1.7	72.3577	5.5935	-0.619789
2.9	3.1	3.2	3.1	3.1	3.2	3.06667	3.13333		0.12	3.1	3.1	2.4	60.9756	5.27868	-0.920819
3.9	3.7	3.5	3.9	3.6	3.2	3.7	3.56667		0.06	3.7	3.6	2.95	52.0325	5.05097	-1.22185
7	7.1	6.8	6.6	6.8	6.6	6.96667	6.66667		CK	7	6.7	6.15	0	#NUM!	#VALUE!
1	1.2	0.9	0.8	0.8	1.2	1.03333	0.933333	58	2	1	0.9	0.25	96.4789	6.80918	0.30103	6.52852	0.85724	-1.78307	0.0164789	0.979228	0.958887
1.3	1.3	1.3	1.4	1.1	1.3	1.28333	1.26667		1	1.25	1.25	0.55	92.2535	6.42233	0
1.3	1.5	1.1	1.6	1.4	1.3	1.3	1.43333		0.48	1.25	1.35	0.6	91.5493	6.37538	-0.318759
1.9	1.7	1.6	1.7	1.8	1.9	1.73333	1.8		0.24	1.7	1.8	1.05	85.2113	6.04554	-0.619789
2.7	2.7	2.8	2.3	2.5	2.9	2.73333	2.56667		0.12	2.7	2.6	1.95	72.5352	5.59882	-0.920819
3.1	3	3	2.8	2.5	2.4	3.03333	2.56667		0.06	3	2.6	2.1	70.4225	5.53659	-1.22185
7.3	7.5	7.4	8.3	8.3	8.1	7.4	8.23333		CK	7.4	8.2	7.1	0	#NUM!	#VALUE!
1	1.4	1.5	0.8	0.9	0.9	1.3	0.866667	59	2	1.3	0.9	0.4	93.0736	6.48129	0.30103	6.09956	1.20852	-0.909836	0.123073	0.990532	0.981153
1.8	1.6	1.8	1.5	1.9	1.2	1.73333	1.53333		1	1.7	1.5	0.9	84.4156	6.01169	0
2	1.9	2.4	1.9	1.9	2.4	2.1	2.06667		0.48	2.1	2	1.35	76.6234	5.7265	-0.318759
2.5	2.4	2.6	2.3	2.2	2.6	2.5	2.36667		0.24	2.5	2.4	1.75	69.697	5.5157	-0.619789
3.9	3.8	3.9	3.8	3.7	3.8	3.86667	3.76667		0.12	3.9	3.8	3.15	45.4545	4.88581	-0.920819
4.4	4.5	4.6	4.3	4.4	4.5	4.5	4.4		0.06	4.5	4.4	3.75	35.0649	4.61643	-1.22185
6.3	6.7	6.2	6.4	6.5	6.8	6.4	6.56667		CK	6.35	6.6	5.775	0	#NUM!	#VALUE!
1.5	1.3	1.5	1.2	1.1	1	1.43333	1.1	60	2	1.4	1.1	0.55	89.7196	6.26574	0.30103	5.96504	1.26173	-0.764849	0.171851	0.975211	0.951036
2.1	2	2	1.4	1.7	1.7	2.03333	1.6		1	2	1.6	1.1	79.4393	5.82176	0
2	2	2	2	1.8	1.6	2	1.8		0.48	2	1.8	1.2	77.5701	5.75775	-0.318759
2.9	2.6	2.5	2.4	2.7	2.5	2.66667	2.53333		0.24	2.7	2.5	1.9	64.486	5.37148	-0.619789
4	3.8	3.9	3.7	3.4	3.8	3.9	3.63333		0.12	3.9	3.6	3.05	42.9907	4.82339	-0.920819
5	5.1	4.7	4.9	4.7	4.7	4.93333	4.76667		0.06	4.9	4.8	4.15	22.4299	4.24225	-1.22185
6.1	6.4	6.4	5.8	5.9	5.7	6.3	5.8		CK	6.3	5.8	5.35	0	#NUM!	#VALUE!
1.5	1.7	1.6	0.8	0.7	0.7	1.6	0.733333	61	2	1.6	0.71	0.455	92.8906	6.46769	0.30103	6.35884	1.02606	-1.32434	0.0473875	0.957332	0.916484
0.9	1.3	1.4	0.8	1	1.2	1.2	1		1	1.2	1	0.4	93.75	6.53412	0
1.7	1.4	1.4	1.1	1.3	1.5	1.5	1.3		0.48	1.5	1.3	0.7	89.0625	6.22986	-0.318759
2.5	2.8	2.6	1.9	2.2	2	2.63333	2.03333		0.24	2.6	2	1.6	75	5.67449	-0.619789
3.3	3.2	3.4	3.2	3.6	3.5	3.3	3.43333		0.12	3.3	3.4	2.65	58.5938	5.21711	-0.920819
3.7	3.4	3.4	3.5	3.3	3.4	3.5	3.4		0.06	3.5	3.4	2.75	57.0312	5.17717	-1.22185
6.9	7.2	7	7.3	7.1	7.2	7.03333	7.2		CK	7	7.2	6.4	0	#NUM!	#VALUE!
0.9	0.9	0.7	0.7	0.5	0.9	0.833333	0.7	62	0.48	0.8	0.71	0.055	99.0265	7.33643	-0.318759	8.2514	2.36525	-1.37466	0.0422031	0.990228	0.980552
0.8	0.8	1	0.6	0.9	0.8	0.866667	0.766667		0.24	0.9	0.8	0.15	97.3451	6.93413	-0.619789
1.2	1.1	1.4	1.6	1.2	1.5	1.23333	1.43333		0.12	1.2	1.4	0.6	89.3805	6.24702	-0.920819
3.2	3	3.4	3	2.9	2.8	3.2	2.9		0.06	3.2	2.9	2.35	58.4071	5.21232	-1.22185
4.5	4.2	4.1	4.3	4.5	4.5	4.26667	4.43333		0.03	4.3	4.35	3.625	35.8407	4.63728	-1.52288
6.3	6.5	6	6.5	6.2	6.4	6.26667	6.36667		CK	6.3	6.4	5.65	0	#NUM!	#VALUE!
						#DIV/0!	#DIV/0!
0.8	0.5	0.7	0.7	0.6	0.7	0.666667	0.666667	64	2	0.72	0.72	0.02	99.6947	7.74199	0.30103	7.06997	1.48509	-1.39384	0.0403797	0.974157	0.948983
0.8	0.8	1.2	0.9	1	0.9	0.933333	0.933333		1	0.9	0.9	0.2	96.9466	6.873	0
1.4	1.1	1.3	1	1.1	1.1	1.26667	1.06667		0.48	1.25	1.1	0.475	92.7481	6.45728	-0.318759
1.2	1.5	1.4	1.3	1.1	1.4	1.36667	1.26667		0.24	1.4	1.3	0.65	90.0763	6.28591	-0.619789
3.1	2.8	2.7	2.6	2.5	2.4	2.86667	2.5		0.12	2.9	2.5	2	69.4656	5.50909	-0.920819
2.8	3	2.9	3.1	3	2.7	2.9	2.93333		0.06	2.9	2.9	2.2	66.4122	5.42374	-1.22185
7.1	7.1	7.3	7.1	7.4	7.3	7.16667	7.26667		CK	7.2	7.3	6.55	0	#NUM!	#VALUE!
0.8	0.5	0.7	0.7	0.9	0.6	0.666667	0.733333	65	0.48	0.71	0.71	0.01	99.8049	7.88594	-0.318759	8.80132	2.80222	-1.35654	0.0440008	0.983713	0.967691
1	0.7	0.8	0.7	0.9	0.8	0.833333	0.8		0.24	0.75	0.75	0.05	99.0244	7.3356	-0.619789
1.5	1.5	1.7	1.6	1.4	1.5	1.56667	1.5		0.12	1.6	1.5	0.85	83.4146	5.97068	-0.920819
3.1	3	3	3	2.9	2.8	3.03333	2.9		0.06	3	2.9	2.25	56.0976	5.15344	-1.22185
3.9	3.5	3.9	3.6	3.6	3.8	3.76667	3.66667		0.03	3.8	3.7	3.05	40.4878	4.75926	-1.52288
5.9	5.7	5.8	6	5.8	5.9	5.8	5.9		CK	5.75	5.9	5.125	0	#NUM!	#VALUE!
						#DIV/0!	#DIV/0!
1.2	1.4	1.6	1.2	1.2	1.5	1.4	1.3	66	0.48	1.4	1.3	0.85	86.0656	6.08327	-0.318759	6.55492	1.22987	-1.2643	0.054413	0.950299	0.903069
2	1.9	1.9	1.9	2.2	2.1	1.93333	2.06667		0.24	1.9	2.1	1.5	75.4098	5.68744	-0.619789
2.4	2.4	2.2	2	2.1	2.4	2.33333	2.16667		0.12	2.3	2.2	1.75	71.3115	5.56251	-0.920819
3.4	3.2	3.4	3.3	3.5	3.4	3.33333	3.4		0.06	3.3	3.4	2.85	53.2787	5.08228	-1.22185
3.4	3.6	3.4	3.4	3.4	3.8	3.46667	3.53333		0.03	3.5	3.5	3	50.8197	5.02055	-1.52288
5.7	5.5	5.5	5.9	5.5	5.6	5.56667	5.66667		0.015	5.6	5.7	5.15	15.5738	3.98787	-1.82391
6.4	6.5	6.8	6.6	6.4	6.8	6.56667	6.6		CK	6.6	6.6	6.1	0
0.5	0.7	0.9	0.7	0.8	0.6	0.7	0.7	69	0.48	0.7	0.7	0.2	93.8462	6.54199	-0.318759	6.943	1.74167	-1.1156	0.0766309	0.956281	0.914474
0.9	0.8	1.2	1	1.1	1.1	0.966667	1.06667		0.24	1	1.1	0.55	83.0769	5.95721	-0.619789
1.7	1.8	1.6	1.6	1.6	1.8	1.7	1.66667		0.12	1.7	1.7	1.2	63.0769	5.33389	-0.920819
2.9	3	3	3	3.2	2.8	2.96667	3		0.06	3	3	2.5	23.0769	4.26368	-1.22185
3.1	3	3	3.2	2.9	2.9	3.03333	3		0.03	3	3	2.5	23.0769	4.26368	-1.52288
3.1	3.2	3	3	3.3	3.4	3.1	3.23333		0.015	3.1	3.2	2.65	18.4615	4.10208	-1.82391
3.5	3.8	3.7	3.6	3.8	3.9	3.66667	3.76667		CK	3.7	3.8	3.25	-47.7273	#NUM!	#VALUE!
0.6	0.8	0.8	0.6	0.6	0.9	0.733333	0.7	70	2	0.71	0.7	0.005	99.8305	7.92998	0.30103	7.19675	2.80785	-0.782358	0.16506	0.947981	0.898668
0.9	0.6	0.6	0.6	0.8	0.8	0.7	0.733333		1	0.71	0.7	0.005	99.8305	7.92998	0
1	1.2	1.3	1	1	1.2	1.16667	1.06667		0.48	1.21	1.1	0.455	84.5763	6.01843	-0.318759
2.3	2.5	2.7	2.2	2.3	2.4	2.5	2.3		0.24	2.5	2.3	1.7	42.3729	4.80764	-0.619789
2.9	3	3	2.9	2.7	2.7	2.96667	2.76667		0.12	3	2.78	2.19	25.7627	4.34932	-0.920819
2.8	2.6	2.9	2.9	3	3	2.76667	2.96667		0.06	2.8	3	2.2	25.4237	4.33879	-1.22185
3.9	3.6	3.9	3.5	3.4	3.6	3.8	3.5		CK	3.8	3.5	2.95	0	#NUM!	#VALUE!
0.6	0.6	0.9	0.7	0.8	0.6	0.7	0.7	71	0.48	0.71	0.71	0.01	99.8374	7.94285	-0.318759	8.58584	2.487	-1.44183	0.0361551	0.992267	0.984595
0.9	0.7	0.8	1	1	0.8	0.8	0.933333		0.24	0.8	0.9	0.15	97.561	6.97051	-0.619789
1.5	1.4	1.6	1.3	1.6	1.4	1.5	1.43333		0.12	1.5	1.4	0.75	87.8049	6.16529	-0.920819
2.7	2.9	2.9	2.7	2.9	2.6	2.83333	2.73333		0.06	2.8	2.7	2.05	66.6667	5.43073	-1.22185
3.9	3.7	3.9	3.8	3.7	3.9	3.83333	3.8		0.03	3.9	3.8	3.15	48.7805	4.96943	-1.52288
7	6.8	6.9	6.6	6.9	6.8	6.9	6.76667		CK	6.9	6.8	6.15	0	#NUM!	#VALUE!
						#DIV/0!	#DIV/0!
0.9	0.6	0.7	0.7	0.6	0.7	0.733333	0.666667	75	2	0.7	0.71	0.005	99.9275	8.18465	0.30103	7.31934	1.78437	-1.29981	0.0501411	0.975289	0.951188
1.1	1	1	0.6	0.8	0.7	1.03333	0.7		1	1	0.7	0.15	97.8261	7.01909	0
1.2	1.1	1	0.9	1	0.8	1.1	0.9		0.48	1.1	0.9	0.3	95.6522	6.71168	-0.318759
1.8	1.7	1.5	1.6	1.8	1.5	1.66667	1.63333		0.24	1.7	1.6	0.95	86.2319	6.0908	-0.619789
2.8	2.6	2.4	2.7	2.6	2.5	2.6	2.6		0.12	2.6	2.6	1.9	72.4638	5.59667	-0.920819
3.1	3	3.1	3.1	3.3	3.4	3.06667	3.26667		0.06	3.1	3.3	2.5	63.7681	5.35227	-1.22185
7.8	7.7	7.4	7.5	7.4	7.9	7.63333	7.6		CK	7.6	7.6	6.9	0	#NUM!	#VALUE!
0.6	0.8	0.8	0.7	0.9	0.6	0.733333	0.733333	77	2	0.71	0.71	0.01	99.8039	7.8844	0.30103	6.9655	1.78615	-1.10041	0.0793576	0.968308	0.93762
1	1.1	1	1	0.7	0.7	1.03333	0.8		1	1	0.8	0.2	96.0784	6.75986	0
1.1	1.3	1.5	1.1	1.5	1.7	1.3	1.43333		0.48	1.3	1.4	0.65	87.2549	6.13852	-0.318759
2.2	2	1.9	1.7	1.9	1.9	2.03333	1.83333		0.24	2	1.8	1.2	76.4706	5.72152	-0.619789
2.6	2.9	2.6	2.5	2.7	2.8	2.7	2.66667		0.12	2.7	2.7	2	60.7843	5.2737	-0.920819
3	3.2	3.3	2.9	3	3.3	3.16667	3.06667		0.06	3.2	3.1	2.45	51.9608	5.04917	-1.22185
6.1	5.9	5.7	5.9	5.6	5.5	5.9	5.66667		CK	5.9	5.7	5.1	0	#NUM!	#VALUE!
1.2	1	1.4	0.9	0.8	0.8	1.2	0.833333	201	2	1.2	0.8	0.3	94.7137	6.6177	0.30103	6.3319	1.01901	-1.30706	0.0493106	0.994238	0.988509
1.3	1	1.5	0.9	0.9	1.3	1.26667	1.03333		1	1.3	1	0.45	92.0705	6.40983	0
2	1.8	1.6	1.7	1.5	1.7	1.8	1.63333		0.48	1.8	1.6	1	82.3789	5.9299	-0.318759
2.2	2	1.9	2	2	2.1	2.03333	2.03333		0.24	2	2	1.3	77.0925	5.7419	-0.619789
2.9	2.6	2.8	3	2.7	2.7	2.76667	2.8		0.12	2.8	2.8	2.1	62.9956	5.33174	-0.920819
3.5	3.2	3.2	3.4	3.1	3.2	3.3	3.23333		0.06	3.3	3.2	2.55	55.0661	5.12733	-1.22185
6.2	6.4	6.6	6.6	6.4	6.2	6.4	6.4		CK	6.4	6.35	5.675	0	#NUM!	#VALUE!
0.8	0.7	0.6	0.7	0.9	0.6	0.7	0.733333	202	2	0.71	0.71	0.01	99.8077	7.89051	0.30103	7.33787	2.10789	-1.1091	0.077785	0.959358	0.920368
0.9	0.6	0.6	0.8	0.6	0.6	0.7	0.666667		1	0.71	0.71	0.01	99.8077	7.89051	0
1.2	1.5	1.3	1.1	1.3	1.2	1.33333	1.2		0.48	1.3	1.2	0.55	89.4231	6.24935	-0.318759
1.9	2	2.1	1.6	1.9	1.6	2	1.7		0.24	2	1.7	1.15	77.8846	5.7683	-0.619789
2.7	2.4	2.5	2.8	2.6	2.6	2.53333	2.66667		0.12	2.5	2.7	1.9	63.4615	5.3441	-0.920819
3.6	3.5	3.3	3.1	2.9	3	3.46667	3		0.06	3.5	3	2.55	50.9615	5.0241	-1.22185
6	6	6.3	5.9	5.7	5.5	6.1	5.7		CK	6.1	5.7	5.2	0	#NUM!	#VALUE!
1.5	1.2	1.2	1.5	1.4	1.4	1.3	1.43333	203	2	1.3	1.4	0.65	86.5979	6.10758	0.30103	5.89062	1.0767	-0.827178	0.148875	0.9874	0.974959
1.8	1.6	1.4	1.4	1.5	1.3	1.6	1.4		1	1.6	1.4	0.8	83.5052	5.97432	0
2	2.1	2.2	1.6	1.9	1.7	2.1	1.73333		0.48	2.1	1.7	1.2	75.2577	5.68262	-0.318759
2.8	3	3.2	2.8	2.6	2.9	3	2.76667		0.24	3	2.8	2.2	54.6392	5.11655	-0.619789
3	3.4	3.2	3.3	3.3	3.7	3.2	3.43333		0.12	3.2	3.4	2.6	46.3918	4.90943	-0.920819
3.8	4	4	3.9	3.8	4.3	3.93333	4		0.06	3.9	4	3.25	32.9897	4.5598	-1.22185
5.7	5.9	5.8	5.3	5.1	5.5	5.8	5.3		CK	5.8	5.3	4.85	0	#NUM!	#VALUE!
1.5	1.4	1	1.2	1.4	1.4	1.3	1.33333	204	0.48	1.3	1.3	0.6	89.4737	6.25212	-0.318759	6.71833	1.41064	-1.21812	0.060517	0.986056	0.972306
1.9	2	2.3	1.9	2.1	2	2.06667	2		0.24	2.1	2	1.35	76.3158	5.7165	-0.619789
2.7	2.5	2.3	2.4	2.3	2.5	2.5	2.4		0.12	2.5	2.4	1.75	69.2982	5.50432	-0.920819
3.1	3.5	3.5	3.5	3.2	3.1	3.36667	3.26667		0.06	3.4	3.3	2.65	53.5088	5.08807	-1.22185
4.2	4.5	4.2	3.9	4.2	4.2	4.3	4.1		0.03	4.25	4.1	3.475	39.0351	4.7216	-1.52288
5.7	5.4	5.8	5.4	5.3	5.8	5.63333	5.5		0.015	5.6	5.5	4.85	14.9123	3.9598	-1.82391
6.4	6.3	6.2	6.2	6.4	6.8	6.3	6.46667		CK	6.3	6.5	5.7	0	#NUM!	#VALUE!
1.2	1	0.9	0.9	0.9	1.4	1.03333	1.06667	205	0.48	1	1.1	0.55	88.6598	6.20863	-0.318759	6.56561	0.999089	-1.56704	0.0270996	0.912925	0.833432
1.9	1.6	1.6	1.5	1.6	1.4	1.7	1.5		0.24	1.7	1.5	1.1	77.3196	5.74941	-0.619789
1.6	1.5	1.9	1.4	1.8	1.7	1.66667	1.63333		0.12	1.7	1.6	1.15	76.2887	5.71562	-0.920819
2	2	1.8	1.8	2	1.7	1.93333	1.83333		0.06	1.9	1.8	1.35	72.1649	5.58775	-1.22185
2.1	2.4	2.5	2.5	2.3	2.2	2.33333	2.33333		0.03	2.3	2.3	1.8	62.8866	5.32885	-1.52288
4.1	3.8	4	4.2	3.9	4.2	3.96667	4.1		0.015	4	4.1	3.55	26.8041	4.38125	-1.82391
5.3	5.2	5	5.4	5.7	5.3	5.16667	5.46667		CK	5.2	5.5	4.85	0	#NUM!	#VALUE!
1	0.6	0.6	0.8	0.6	0.7	0.733333	0.7	206	2	0.71	0.71	0.01	99.798	7.87499	0.30103	6.94573	1.72567	-1.12752	0.0745551	0.946921	0.896659
1	1.1	0.6	0.7	0.9	0.7	0.9	0.766667		1	0.9	0.8	0.15	96.9697	6.87636	0
2.2	2	1.6	1.3	1.6	1.7	1.93333	1.53333		0.48	1.9	1.5	1	79.798	5.83443	-0.318759
1.8	1.7	1.6	2	1.6	1.7	1.7	1.76667		0.24	1.7	1.8	1.05	78.7879	5.79908	-0.619789
2.3	2.4	2.5	2.4	2.6	2.3	2.4	2.43333		0.12	2.4	2.4	1.7	65.6566	5.40311	-0.920819
3.1	2.9	2.8	3	2.8	3.4	2.93333	3.06667		0.06	2.9	3.1	2.3	53.5354	5.08873	-1.22185
5.8	5.4	5.8	5.4	5.7	5.6	5.66667	5.56667		CK	5.7	5.6	4.95	0	#NUM!	#VALUE!
1.2	1	0.9	0.7	0.9	0.5	1.03333	0.7	207	2	1	0.71	0.155	96.8367	6.85732	0.30103	6.49048	1.30159	-1.14513	0.0715937	0.991809	0.983684
1	1.3	1.3	1.1	0.8	0.9	1.2	0.933333		1	1.2	0.9	0.35	92.8571	6.46523	0
1.2	1.1	1.6	1	1.4	1.3	1.3	1.23333		0.48	1.3	1.2	0.55	88.7755	6.21468	-0.318759
2	1.7	1.9	2	2	2.1	1.86667	2.03333		0.24	1.9	2	1.25	74.4898	5.65852	-0.619789
3	2.9	2.8	2.7	2.7	2.9	2.9	2.76667		0.12	2.9	2.8	2.15	56.1224	5.15407	-0.920819
3.2	3.1	3.6	3.1	3.2	3.2	3.3	3.16667		0.06	3.25	3.15	2.5	48.9796	4.97442	-1.22185
5.7	5.8	5.6	5.4	5.7	5.5	5.7	5.53333		CK	5.7	5.5	4.9	0	#NUM!	#VALUE!
0.7	0.7	0.5	0.5	0.8	0.6	0.633333	0.633333	208	0.48	0.6	0.6	0.1	97.8723	7.02807	-0.318759	7.45372	1.77856	-1.37961	0.0417241	0.989096	0.978311
0.9	1	0.9	1	1.1	1	0.933333	1.03333		0.24	0.9	1	0.45	90.4255	6.30619	-0.619789
1.7	1.6	1.8	1.5	1.7	1.5	1.7	1.56667		0.12	1.7	1.6	1.15	75.5319	5.69132	-0.920819
2.2	2.3	2.4	2.4	2.4	2	2.3	2.26667		0.06	2.3	2.3	1.8	61.7021	5.29767	-1.22185
3.6	3.8	3.8	3.4	3.6	3.7	3.73333	3.56667		0.03	3.7	3.6	3.15	32.9787	4.5595	-1.52288
3.9	3.7	3.8	4	3.9	4.1	3.8	4		0.015	3.8	4	3.4	27.6596	4.40702	-1.82391
5	5.2	5.4	5.3	5.2	5.1	5.2	5.2		CK	5.2	5.2	4.7	0
0.4	0.7	0.8	0.5	0.7	0.7	0.633333	0.633333	216	0.48	0.6	0.6	0.1	98.6014	7.19768	-0.318759	7.54269	1.7524	-1.45098	0.0354014	0.986079	0.972351
1.2	1.1	1.4	1.2	1	1.1	1.23333	1.1		0.24	1.2	1.1	0.65	90.9091	6.33518	-0.619789
2	2.4	2.1	2.1	2.3	2.4	2.16667	2.26667		0.12	2.2	2.2	1.7	76.2238	5.71352	-0.920819
2.9	3.2	3.1	3.2	3.2	3	3.06667	3.1		0.06	3.1	3.1	2.6	63.6364	5.34876	-1.22185
4.1	4	3.9	3.7	4.1	3.9	4	3.9		0.03	4	3.9	3.45	51.7483	5.04384	-1.52288
5.7	5.9	5.8	5.8	5.6	5.9	5.8	5.76667		0.015	5.8	5.8	5.3	25.8741	4.35277	-1.82391
7.6	7.9	7.5	7.5	7.8	7.4	7.66667	7.56667		CK	7.7	7.6	7.15	0	#NUM!	#VALUE!
1.3	1.5	1.5	1	0.9	1	1.43333	0.966667	217	0.48	1.4	1	0.5	87.9518	6.17258	-0.318759	6.61909	1.24216	-1.30345	0.0497223	0.987284	0.974729
1.3	1.2	1.6	1.5	1.7	1.6	1.36667	1.6		0.24	1.4	1.6	0.8	80.7229	5.86773	-0.619789
1.9	1.6	1.8	1.7	1.9	1.9	1.76667	1.83333		0.12	1.8	1.8	1.1	73.494	5.62782	-0.920819
2.8	2.9	2.6	3	3.3	3.1	2.76667	2.95		0.06	2.8	3	2.2	46.988	4.92443	-1.22185
3	3.1	2.9	3.1	3	3.5	3	3.2		0.03	3	3.2	2.4	42.1687	4.80242	-1.52288
3.5	3.8	3.9	4	3.9	3.7	3.73333	3.86667		0.015	3.7	3.9	3.1	25.3012	4.33496	-1.82391
5.1	4.9	5	4.8	4.7	4.6	5	4.7		CK	5	4.7	4.15	0	#NUM!	#VALUE!
1.1	1.3	1	1	0.7	0.7	1.13333	0.8	218	0.48	1.1	0.8	0.45	86.3636	6.0968	-0.318759	6.57215	1.31221	-1.19809	0.0633736	0.982595	0.965493
1	1	1	1.1	1	1.3	1	1.13333		0.24	1	1.1	0.55	83.3333	5.96742	-0.619789
2	1.8	1.6	2.1	1.9	1.8	1.8	1.93333		0.12	1.8	1.9	1.35	59.0909	5.22988	-0.920819
2.3	2.2	2.1	2.1	2.4	2.3	2.2	2.23333		0.06	2.2	2.2	1.7	48.4848	4.96201	-1.22185
3	2.8	2.7	2.8	3	2.9	2.83333	2.9		0.03	2.8	2.9	2.35	28.7879	4.44041	-1.52288
3	3.1	2.9	3.2	2.9	3	3	3.03333		0.015	3	3	2.5	24.2424	4.30147	-1.82391
4	3.7	3.7	3.8	3.6	3.9	3.8	3.76667		CK	3.8	3.8	3.3	0	#NUM!	#VALUE!
0.9	0.7	0.6	0.6	0.9	0.5	0.733333	0.666667	219	0.48	0.71	0.71	0.01	99.8462	7.95995	-0.318759	8.32621	2.66133	-1.24983	0.0562562	0.956515	0.914922
1.3	1.6	1.7	1.1	1.4	1.5	1.53333	1.33333		0.24	1.5	1.3	0.7	89.2308	6.23889	-0.619789
2.4	2.7	2.8	2.1	2.4	2.3	2.63333	2.26667		0.12	2.6	2.3	1.75	73.0769	5.61514	-0.920819
4.1	3.9	4.1	4	3.9	4.2	4.03333	4.03333		0.06	4	4	3.3	49.2308	4.98072	-1.22185
5.2	4.8	5.3	5	4.8	4.9	5.1	4.9		0.03	5.1	4.9	4.3	33.8462	4.58333	-1.52288
7.8	7.6	7.4	6.6	6.8	7	7.6	6.8		CK	7.6	6.8	6.5	0	#NUM!	#VALUE!
						#DIV/0!	#DIV/0!
0.6	0.5	0.4	0.5	0.6	0.5	0.5	0.533333	222	0.48	0.51	0.5	0.005	99.9057	8.1075	-0.318759	8.08808	2.15406	-1.43361	0.0368463	0.931423	0.867549
1.4	1.2	1.3	1.2	1	1	1.3	1.06667		0.24	1.3	1.1	0.7	90.3448	6.30145	-0.619789
2.4	2.8	2.5	2.3	2.5	2.7	2.56667	2.5		0.12	2.6	2.5	2.05	71.7241	5.57467	-0.920819
3.6	3.5	3.1	3	3.1	3.2	3.4	3.25		0.06	3.4	3.3	2.85	60.6897	5.27124	-1.22185
4	3.9	4	4.1	3.8	4.1	3.96667	4		0.03	4	4	3.5	51.7241	5.04323	-1.52288
6	5.7	5.7	6	5.6	5.9	5.8	5.83333		0.015	5.8	5.8	5.3	26.8966	4.38406	-1.82391
7.5	7.8	7.7	7.9	7.6	7.8	7.66667	7.76667		CK	7.7	7.8	7.25	0
0.5	0.7	0.4	0.6	0.5	0.4	0.533333	0.5	223	0.48	0.51	0.51	0.01	99.8675	8.00578	-0.318759	8.15244	2.11358	-1.49152	0.0322465	0.956245	0.914405
1	1.3	1.4	1.1	1	1.3	1.23333	1.13333		0.24	1.2	1.1	0.65	91.3907	6.36522	-0.619789
1.7	1.8	1.6	1.5	1.7	1.5	1.7	1.56667		0.12	1.7	1.6	1.15	84.7682	6.02654	-0.920819
3.4	3.2	3	3.3	3.2	3.4	3.2	3.25		0.06	3.2	3.3	2.75	63.5762	5.34715	-1.22185
4	3.8	3.7	3.6	3.7	3.4	3.83333	3.56667		0.03	3.8	3.6	3.2	57.6159	5.19208	-1.52288
5.9	6.2	6	6.2	6	5.8	6.03333	6		0.015	6	6	5.5	27.1523	4.39179	-1.82391
8	7.9	8	8.2	8	8.1	7.96667	8.1		CK	8	8.1	7.55	0	#NUM!	#VALUE!
1.8	1.9	1.7	1.5	1.3	1.5	1.8	1.43333	227	0.48	1.8	1.4	0.9	81.4433	5.89435	-0.318759	6.44281	1.40774	-1.02491	0.0944253	0.98388	0.968019
2.3	2.4	2	2.1	2.2	2.4	2.23333	2.23333		0.24	2.2	2.2	1.5	69.0722	5.4979	-0.619789
2.6	2.8	2.7	2.4	2.7	2.5	2.7	2.53333		0.12	2.7	2.5	1.9	60.8247	5.27475	-0.920819
3	2.8	3.1	4.2	4.5	4.3	2.96667	3.65		0.06	3	3.7	2.65	45.3608	4.88345	-1.22185
4.3	4.5	4.2	4.4	4.1	4	4.33333	4.16667		0.03	4.3	4.2	3.55	26.8041	4.38125	-1.52288
5	5.3	5.2	4.9	5.2	5	5.16667	5.03333		0.015	5.2	5	4.4	9.27835	3.67619	-1.82391
5.5	5.3	5.3	5.6	5.5	5.9	5.36667	5.66667		CK	5.4	5.7	4.85	0	#NUM!	#VALUE!
1.5	1.3	1.2	1	1.2	1	1.33333	1.06667	229	0.48	1.3	1.1	0.7	90.4762	6.30917	-0.318759	6.8199	1.23782	-1.47024	0.0338653	0.985226	0.970671
1.7	1.3	1.8	1.4	1.7	1.5	1.6	1.53333		0.24	1.6	1.5	1.05	85.7143	6.06757	-0.619789
2.1	2	1.9	2.1	2	1.8	2	1.96667		0.12	2	2	1.5	79.5918	5.82713	-0.920819
3.5	3.4	3.2	3.2	3.1	3.1	3.36667	3.25		0.06	3.4	3.3	2.85	61.2245	5.28517	-1.22185
3.8	4.1	4	3.9	4.1	4	3.96667	4		0.03	4	4	3.5	52.381	5.05972	-1.52288
6	5.7	5.6	5.5	5.7	6.1	5.76667	5.76667		0.015	5.8	5.8	5.3	27.8912	4.41392	-1.82391
8	7.9	7.6	8	8	7.8	7.83333	7.93333		CK	7.8	7.9	7.35	0
0.6	1	0.7	1.1	0.7	0.5	0.766667	0.766667	231	0.48	0.8	0.8	0.1	96.6102	6.82636	-0.318759	7.08141	2.06385	-1.00851	0.09806	0.97071	0.942277
1.8	1.7	1.6	1.7	1.7	1.5	1.7	1.63333		0.24	1.7	1.6	0.95	67.7966	5.46202	-0.619789
2.6	2.4	2.3	2.3	2.1	2.5	2.43333	2.3		0.12	2.4	2.3	1.65	44.0678	4.85075	-0.920819
2.5	2.8	2.6	2.6	2.4	2.3	2.63333	2.53333		0.06	2.6	2.5	1.85	37.2881	4.67577	-1.22185
3.3	3	2.9	3.1	3.2	3.2	3.06667	3.16667		0.03	3.1	3.2	2.45	16.9492	4.04382	-1.52288
3.3	3.4	3.7	3.7	3.5	3.2	3.46667	3.46667		0.015	3.5	3.5	2.8	5.08475	3.36331	-1.82391
3.9	3.7	3.5	3.6	3.8	3.3	3.7	3.56667		CK	3.7	3.6	2.95	0	#NUM!	#VALUE!
0.9	0.9	1.2	1.1	1.1	1.3	1	1.16667	233	0.48	1	1.2	0.4	92.7273	6.45578	-0.318759	6.84441	1.34286	-1.3735	0.042316	0.993062	0.986172
1.7	1.4	1.4	1.3	1.5	1.4	1.5	1.4		0.24	1.5	1.4	0.75	86.3636	6.0968	-0.619789
2.2	2.4	2.5	2.6	2.4	2.2	2.36667	2.4		0.12	2.4	2.4	1.7	69.0909	5.49843	-0.920819
3.1	3	3.4	3.2	3.2	3.6	3.16667	3.25		0.06	3.2	3.3	2.55	53.6364	5.09128	-1.22185
4.1	3.9	3.7	3.8	3.7	3.8	3.9	3.76667		0.03	3.9	3.8	3.15	42.7273	4.81668	-1.52288
4.6	4.4	4.7	4.3	4.7	4.6	4.56667	4.53333		0.015	4.6	4.5	3.85	30	4.4756	-1.82391
6.2	6.3	6	6	6.2	6.4	6.16667	6.2		CK	6.2	6.2	5.5	0	#NUM!	#VALUE!
1.9	2	2	1.6	1.8	1.9	1.96667	1.76667	237	0.48	2	1.8	1.2	76.9231	5.73632	-0.318759	5.80376	0.758509	-1.05966	0.0871642	0.946917	0.896652
2.5	2.8	2.7	2.4	2.5	2.8	2.66667	2.56667		0.24	2.7	2.6	1.95	62.5	5.31864	-0.619789
3.8	3.4	3.3	3.5	3.5	3.7	3.5	3.56667		0.12	3.5	3.6	2.85	45.1923	4.8792	-0.920819
4	3.7	4.1	3.2	3.4	3.3	3.93333	3.61667		0.06	3.9	3.6	3.05	41.3462	4.78135	-1.22185
3.9	3.9	4.2	3.7	3.8	4	4	3.83333		0.03	4	3.8	3.2	38.4615	4.70662	-1.52288
4	4.2	4.4	4.1	4.2	4.5	4.2	4.26667		0.015	4.2	4.3	3.55	31.7308	4.52476	-1.82391
5.9	5.8	5.5	6	6.1	6.2	5.73333	6.1		CK	5.7	6.1	5.2	0	#NUM!	#VALUE!

## Sheet: strains added
编号	浓度	L1	R1	L2	R2	L3	R3	L	F	平均	抑制率	几率值	浓度对数	a	b	x	EC50	r
LF224	0.48	2.1	2.3	2	2.1	1.9	1.9	2	2.1	1.35	77.3109	5.74913	-0.318759	6.06654	1.05882	-1.00729	0.0983348	0.989373
	0.24	2.5	2.5	2.4	2.5	2.6	2.8	2.5	2.6	1.85	68.9076	5.49323	-0.619789
	0.12	3.7	3.8	3.8	4	3.6	3.7	3.7	3.83333	3.06667	48.4594	4.96137	-0.920819
	0.06	4.3	4.3	4	4.2	4.2	4	4.16667	4.16667	3.46667	41.7367	4.79137	-1.22185
	0.03	5	5	5.2	5.1	5.1	5	5.1	5.03333	4.36667	26.6106	4.37537	-1.52288
	0.015	5.5	5.4	5.2	5.2	5.5	5.3	5.4	5.3	4.65	21.8487	4.22269	-1.82391
	CK	6.7	6.8	6.5	6.6	6.6	6.7	6.6	6.7	5.95	0	#NUM!	#VALUE!
LF225	0.48	1	1.2	1.2	1.1	1	1.3	1.06667	1.2	0.433333	92.4419	6.43544	-0.318759	7.02045	1.6958	-1.19145	0.0643506	0.992335
	0.24	1.6	1.7	1.5	1.7	1.6	1.6	1.56667	1.66667	0.916667	84.0116	5.99494	-0.619789
	0.12	2.5	2.3	2.3	2.3	2.6	2.2	2.46667	2.26667	1.66667	70.9302	5.55135	-0.920819
	0.06	4	4.2	4.1	4	4	4	4.03333	4.06667	3.35	41.5698	4.78709	-1.22185
	0.03	4.5	4.6	4.3	4.3	4.5	4.5	4.43333	4.46667	3.75	34.593	4.60367	-1.52288
	0.015	5.8	6	5.7	5.7	5.6	5.5	5.7	5.73333	5.01667	12.5	3.84965	-1.82391
	CK	6.3	6.3	6.7	6.4	6.4	6.5	6.46667	6.4	5.73333	0	#NUM!	#VALUE!
LF226	0.48	1.2	1.2	1.2	1.4	1	1.1	1.13333	1.23333	0.483333	91.1585	6.35058	-0.318759	6.79155	1.46492	-1.22296	0.0598461	0.998766
	0.24	1.7	1.7	1.8	2	1.6	1.8	1.7	1.83333	1.06667	80.4878	5.85918	-0.619789
	0.12	2.3	2.4	2.4	2.6	2.5	2.6	2.4	2.53333	1.76667	67.6829	5.45885	-0.920819
	0.06	3.3	3.2	3.4	3.7	3.5	3.6	3.4	3.5	2.75	49.6951	4.99236	-1.22185
	0.03	4.5	4.5	4.8	4.6	4.3	4.2	4.53333	4.43333	3.78333	30.7927	4.49826	-1.52288
	0.015	5	5	5.2	5	5.1	5	5.1	5	4.35	20.4268	4.17353	-1.82391
	CK	6.2	6	6	6.3	6.2	6.3	6.13333	6.2	5.46667	0	#NUM!	#VALUE!
LF228	0.48	1.2	1.4	1.5	1.5	1.2	1.3	1.3	1.4	0.65	85.9206	6.07676	-0.318759	6.51968	1.07771	-1.4101	0.0388955	0.984827
	0.24	1.5	1.5	1.4	1.5	1.6	1.5	1.5	1.5	0.8	82.6715	5.94126	-0.619789
	0.12	1.8	1.7	2	1.8	2	2	1.93333	1.83333	1.18333	74.3682	5.65474	-0.920819
	0.06	2.9	2.8	3	2.8	2.9	3	2.93333	2.86667	2.2	52.3466	5.05885	-1.22185
	0.03	3.2	3	3.3	3.2	3.2	3	3.23333	3.06667	2.45	46.9314	4.92301	-1.52288
	0.015	3.7	3.8	3.8	4	3.8	3.9	3.76667	3.9	3.13333	32.13	4.53593	-1.82391
	CK	5.2	5.2	5	5	5.7	5.8	5.3	5.33333	4.61667	0	#NUM!	#VALUE!
XT3	0.48	0.8	0.8	0.9	1	0.8	0.9	0.833333	0.9	0.166667	96.5278	6.81552	-0.318759	7.25256	2.12395	-1.06055	0.0869859	0.978034
	0.24	1.6	1.4	1.5	1.5	1.4	1.2	1.5	1.36667	0.733333	84.7222	6.02459	-0.619789
	0.12	3.5	3.2	3.4	3.4	3.2	3.3	3.36667	3.3	2.63333	45.1389	4.87785	-0.920819
	0.06	4	4	4.2	4.1	4	4.2	4.06667	4.1	3.38333	29.5139	4.46157	-1.22185
	0.03	4.5	4.7	4.5	4.5	4.6	4.8	4.53333	4.66667	3.9	18.75	4.11285	-1.52288
	0.015	5	5.2	5	5.1	5.2	5.3	5.06667	5.2	4.43333	7.63889	3.57021	-1.82391
	CK	5.6	5.4	5.5	5.5	5.4	5.6	5.5	5.5	4.8	0	#NUM!	#VALUE!
XT220	0.48	1.3	1.1	1	1.1	1.2	1	1.16667	1.06667	0.416667	92.236	6.42113	-0.318759	6.65351	1.30996	-1.26225	0.0546695	0.986463
	0.24	1.8	2	2.1	2	2	2	1.96667	2	1.28333	76.087	5.7091	-0.619789
	0.12	2.7	2.6	2.6	2.6	2.7	2.5	2.66667	2.56667	1.91667	64.2857	5.36611	-0.920819
	0.06	3.5	3.3	3.4	3.3	3.5	3.6	3.46667	3.4	2.73333	49.0683	4.97664	-1.22185
	0.03	4	4.2	4	4	4.3	4.1	4.1	4.1	3.4	36.646	4.65876	-1.52288
	0.015	4.8	4.7	4.7	4.5	4.6	4.6	4.7	4.6	3.95	26.3975	4.36886	-1.82391
	CK	6	6.1	6.1	6	6.1	6.1	6.06667	6.06667	5.36667	0	#NUM!	#VALUE!
XT221	0.48	1.2	1	1.3	1.2	1.2	1.4	1.23333	1.2	0.516667	91.5989	6.37859	-0.318759	6.75921	1.51321	-1.16257	0.0687754	0.995722
	0.24	2.3	2.1	2.3	2	2.4	2.2	2.33333	2.1	1.51667	75.3388	5.68519	-0.619789
	0.12	2.6	3	2.8	3	3	3	2.8	3	2.2	64.2276	5.36455	-0.920819
	0.06	3.7	3.9	4	4.1	4	3.8	3.9	3.93333	3.21667	47.6965	4.94223	-1.22185
	0.03	5	5.1	5	5	5.3	5.2	5.1	5.1	4.4	28.4553	4.43063	-1.52288
	0.015	5.9	5.8	5.8	5.9	6	5.6	5.9	5.76667	5.13333	16.5312	4.02714	-1.82391
	CK	7	6.8	6.7	6.8	7	6.8	6.9	6.8	6.15	0	#NUM!	#VALUE!
HS16	0.48	0.8	0.9	0.8	0.8	0.8	0.9	0.8	0.866667	0.133333	97.5976	6.97694	-0.318759	7.14454	1.68305	-1.2742	0.053186	0.966
	0.24	2.2	2	2	2.1	2	1.8	2.06667	1.96667	1.31667	76.2763	5.71522	-0.619789
	0.12	2.5	2.3	2.3	2.3	2.5	2.7	2.43333	2.43333	1.73333	68.7688	5.48931	-0.920819
	0.06	3.4	3.4	3.5	3.4	3.5	3.3	3.46667	3.36667	2.71667	51.0511	5.02635	-1.22185
	0.03	4	4.2	4.2	4.1	4	4	4.06667	4.1	3.38333	39.039	4.7217	-1.52288
	0.015	5.3	5.2	5.2	5	5.3	5.2	5.26667	5.13333	4.5	18.9189	4.11911	-1.82391
	CK	6.4	6.3	6.3	6	6.2	6.3	6.3	6.2	5.55	0	#NUM!	#VALUE!
HS232	0.48	1.2	1	1	1.1	1	0.9	1.06667	1	0.333333	92.4812	6.4382	-0.318759	6.60115	1.32777	-1.20589	0.0622455	0.975292
	0.24	1.8	2	2	2.1	2	2	1.93333	2.03333	1.28333	71.0526	5.55492	-0.619789
	0.12	2.5	2.3	2.3	2.4	2.6	2.5	2.46667	2.4	1.73333	60.9023	5.27677	-0.920819
	0.06	3	3.1	3	3	3.2	3.1	3.06667	3.06667	2.36667	46.6165	4.91509	-1.22185
	0.03	3.5	3.7	3.5	3.6	3.6	3.7	3.53333	3.66667	2.9	34.5865	4.60349	-1.52288
	0.015	4	4.2	4	4.1	4	4.2	4	4.16667	3.38333	23.6842	4.2835	-1.82391
	CK	5	5.3	5	5	5.2	5.3	5.06667	5.2	4.43333	0	#NUM!	#VALUE!
HS234	0.48	1	1.2	1.1	1	1	1.2	1.03333	1.13333	0.383333	93.1138	6.48432	-0.318759	6.75754	1.41424	-1.24274	0.057182	0.987675
	0.24	2	1.9	2	2.1	2	2	2	2	1.3	76.6467	5.72726	-0.619789
	0.12	2.8	2.7	2.7	2.7	2.9	2.8	2.8	2.73333	2.06667	62.8743	5.32852	-0.920819
	0.06	3.5	3.2	3.3	3.3	3.6	3.5	3.46667	3.33333	2.7	51.497	5.03753	-1.22185
	0.03	4.2	4	4.3	4.3	4	4.1	4.16667	4.13333	3.45	38.024	4.69515	-1.52288
	0.015	5.2	5	5.3	5.2	5	5	5.16667	5.06667	4.41667	20.6587	4.18168	-1.82391
	CK	6.3	6.5	6.4	6.2	6.2	6	6.3	6.23333	5.56667	0	#NUM!	#VALUE!

## Sheet: EC list
regions	strain	EC50	ressitance index
SJZ	58	0.0165	0.269168
CZ	1	0.0261	0.425775
SJZ	4	0.0268	0.437194
SJZ	205	0.0271	0.442088
BD	35	0.0281	0.458401								39	0.549296
CZ	22	0.0307	0.500816	5	39	18	3	3	3		71
TS	13	0.0319	0.520392	7.04225	54.9296	25.3521	4.22535	4.22535	4.22535
LF	223	0.0322	0.525285	<0.03	0.03-0.06	0.06-0.09	0.09-0.12	0.12-0.15	0.15-0.18		57	0.802817
BD	37	0.0326	0.531811
SJZ	43	0.0333	0.54323
SJZ	40	0.0337	0.549755
CZ	23	0.0338	0.551387
LF	229	0.0339	0.553018
SJZ	216	0.0354	0.577488
HD	71	0.0362	0.590538
XT	222	0.0369	0.601958
CZ	26	0.0374	0.610114
LF	228	0.0389	0.634584
TS	64	0.0404	0.659054
CZ	24	0.041	0.668842
BD	33	0.0415	0.676998
SJZ	208	0.0417	0.680261
SJZ	62	0.0422	0.688418
HS	233	0.0423	0.690049
XT	55	0.0433	0.706362
TS	65	0.044	0.717781
HS	17	0.0441	0.719413
BD	36	0.0447	0.729201
BD	34	0.0452	0.737357
SJZ	6	0.0468	0.763458
LF	226	0.0471	0.768352
SJZ	61	0.0474	0.773246
BD	38	0.0474	0.773246
SJZ	201	0.0493	0.804241
SJZ	217	0.0497	0.810767
CZ	29	0.05	0.815661
HD	75	0.0501	0.817292
HD	32	0.0512	0.835237
HS	16	0.0532	0.867863
TS	66	0.0544	0.887439
XT	220	0.0547	0.892333
CZ	219	0.0563	0.918434
HS	234	0.0572	0.933116
HD	15	0.0583	0.95106
SJZ	204	0.0605	0.986949
HS	232	0.0622	1.01468
CZ	218	0.0634	1.03426
LF	225	0.0644	1.05057
HS	18	0.0671	1.09462
XT	54	0.0672	1.09625
XT	221	0.0688	1.12235	EC50 added
SJZ	207	0.0716	1.16803
HD	14	0.0739	1.20555
XT	56	0.0742	1.21044
SJZ	206	0.0746	1.21697
TS	69	0.0766	1.24959
CZ	27	0.0774	1.26264
SJZ	202	0.0778	1.26917
HD	77	0.0794	1.29527
SJZ	39	0.0845	1.37847
XT	3	0.087	1.41925
CZ	237	0.0872	1.42251
LF	227	0.0944	1.53997
HS	231	0.0981	1.60033
LF	224	0.1009	1.646
SJZ	59	0.1231	2.00816
SJZ	11	0.1407	2.29527
SJZ	203	0.1489	2.42904
TS	70	0.1651	2.69331
SJZ	60	0.1719	2.80424
HD	31	0.1789	2.91843
		0.0613352
		0.0346428

## Sheet: screening ac region
	BD	35	0.0281			CZ	1	0.0261			HD	71	0.0362		HS	233	0.0423
	BD	37	0.0326			CZ	22	0.0307			HD	75	0.0501		HS	17	0.0441
	BD	33	0.0415			CZ	23	0.0338			HD	32	0.0512		HS	16	0.0532
	BD	36	0.0447			CZ	26	0.0374			HD	15	0.0583		HS	234	0.0572
	BD	34	0.0452			CZ	24	0.041			HD	14	0.0739		HS	232	0.0622
	BD	38	0.0474	0.00777777		CZ	29	0.05			HD	77	0.0794		HS	18	0.0671
			0.0399167	1.68683		CZ	219	0.0563			HD	31	0.1789	0.0479327	HS	231	0.0981	0.0188172
						CZ	218	0.0634					0.0754286	4.94199			0.0606	2.31915
						CZ	27	0.0774
						CZ	237	0.0872	0.0205444
								0.05033	3.341
											SJZ	58	0.0165		TS	13	0.0319
	LF	223	0.0322			XT	222	0.0369			SJZ	4	0.0268		TS	64	0.0404
	LF	229	0.0339			XT	55	0.0433			SJZ	205	0.0271		TS	65	0.044
	LF	228	0.0389			XT	220	0.0547			SJZ	43	0.0333		TS	66	0.0544
	LF	226	0.0589			XT	221	0.0688			SJZ	40	0.0337		TS	69	0.0766
	LF	225	0.0644			XT	54	0.0672			SJZ	216	0.0354		TS	70	0.1651	0.0496489
	LF	227	0.0944			XT	56	0.0742			SJZ	208	0.0417				0.0687333	5.17555
	LF	224	0.1009	0.028208		XT	3	0.087	0.0176993		SJZ	62	0.0422
			0.0605143	3.13354				0.0617286	2.35772		SJZ	6	0.0468
											SJZ	61	0.0474
											SJZ	201	0.0493
											SJZ	217	0.0497
											SJZ	204	0.0605
			EC50 added								SJZ	207	0.0716
											SJZ	206	0.0746
											SJZ	202	0.0778
											SJZ	39	0.0845
											SJZ	59	0.1231
											SJZ	11	0.1407
											SJZ	203	0.1489
											SJZ	60	0.1719	0.0438722
													0.0668333	10.4182
