# Supplementary material for: Detection of fungicide resistance to fludioxonil and tebuconazole in Fusarium pseudograminearum, the causal agent of Fusarium crown rot in wheat
Source: PeerJ. 2023 Jan 26;11:e14705. doi: 10.7717/peerj.14705 (PMC9884474; doi:10.7717/peerj.14705)
Supplement: Supplemental Information 2 [file peerj-11-14705-s002.xlsx]

## Sheet: Tebuconazole
L1	L2	L3	F1	F2	F3			编号	浓度	L	F	平均	抑制率	几率值	浓度对数	a	b	x	EC50			r	r^2
0.71	0.71	0.71	0.71	0.71	0.71	0.71	0.71	1	6.4	0.71	0.71	0.01	99.8675	8.00578	0.80618	6.25426	1.50931	-0.831016	0.147565			0.959167	0.920001
1.8	1.8	1.8	2	1.8	1.9	1.8	1.9		1.6	1.8	1.9	1.15	84.7682	6.02654	0.20412
3.6	3.4	3.5	3.4	3.3	3.5	3.5	3.4		0.4	3.4	3.4	2.7	64.2384	5.36484	-0.39794
5	5.1	4.9	5.2	5.3	5.1	5	5.2		0.1	5	5.2	4.4	41.7219	4.79099	-1
7	7	7	6.8	6.9	7	7	6.9		0.025	7	6.8	6.2	17.8808	4.08008	-1.60206
8.2	8.2	8.2	8.3	8.3	8.3	8.2	8.3		CK	8.2	8.3	7.55	0	#NUM!	#VALUE!
0.71	0.71	0.71	0.71	0.71	0.71	0.71	0.71	2	6.4	0.71	0.71	0.01	99.7826	7.85176	0.80618	6.0127	1.56846	-0.645663	0.226119			0.956083	0.914095
1.8	1.8	1.8	1.7	1.7	1.7	1.8	1.7		1.6	1.8	1.7	1.05	77.1739	5.74459	0.20412
2.8	3	2.9	2.4	2.5	2.6	2.9	2.5		0.4	2.9	2.5	2	56.5217	5.16421	-0.39794
4	4.2	3.8	4.2	4.3	4.1	4	4.2		0.1	4	4.2	3.4	26.087	4.35933	-1
4.7	4.6	4.8	4.8	4.8	4.8	4.7	4.8		0.025	4.8	4.7	4.05	11.9565	3.82284	-1.60206
5.2	5.3	5.1	5.4	5.4	5.4	5.2	5.4		CK	5.2	5.4	4.6	0	#NUM!	#VALUE!
1.5	1.4	1.3	1.4	1.4	1.4	1.4	1.4	3	6.4	1.4	1.4	0.7	86.1386	6.08657	0.80618	5.10902	1.0157	-0.107339	0.781019			0.97072	0.942297
2.5	2.7	2.6	2.4	2.8	2.3	2.6	2.5		1.6	2.6	2.5	1.85	63.3663	5.34157	0.20412
4.9	5	4.8	4.3	4.2	4.1	4.9	4.2		0.4	4.9	4.2	3.85	23.7624	4.28603	-0.39794
5	5	5	4.2	4.3	4.4	5	4.3		0.1	5	4.3	3.95	21.7822	4.22043	-1
5.6	5.7	5.8	5.2	5	4.8	5.7	5		0.025	5.7	5	4.65	7.92079	3.58958	-1.60206
6.2	5.5	6	5.8	5.2	5.8	5.9	5.6		CK	5.9	5.6	5.05	0	#NUM!	#VALUE!
0.71	0.71	0.71	0.71	0.71	0.71	0.71	0.71	4	6.4	0.71	0.71	0.01	99.8592	7.98704	0.80618	6.16655	1.61626	-0.721761	0.189775			0.963468	0.92827
1.5	1.5	1.5	1.9	1.8	1.7	1.5	1.8		1.6	1.5	1.8	0.95	86.6197	6.10859	0.20412
4	4.3	4	3.8	3.7	3.6	4.1	3.7		0.4	4.1	3.7	3.2	54.9296	5.12388	-0.39794
6.2	6	5.8	5.8	5.7	5	6	5.5		0.1	6	5.5	5.05	28.8732	4.44291	-1
6.8	7.2	7	6.8	6.4	6.3	7	6.5		0.025	7	6.5	6.05	14.7887	3.95446	-1.60206
7.8	7.8	7.8	7.8	7.8	7.8	7.8	7.8		CK	7.8	7.8	7.1	0	#NUM!	#VALUE!
0.71	0.71	0.71	0.71	0.71	0.71	0.71	0.71	5	6.4	0.71	0.71	0.01	99.7436	7.79887	0.80618	6.0472	1.5187	-0.689538	0.204391			0.958352	0.918439
1.5	1.6	1.7	1.5	1.5	1.5	1.6	1.5		1.6	1.5	1.6	0.85	78.2051	5.77914	0.20412
2.3	2	2.3	2.2	2	2.1	2.2	2.1		0.4	2.2	2.1	1.45	62.8205	5.3271	-0.39794
3.5	3.5	3.5	3.5	3.6	3.7	3.5	3.6		0.1	3.5	3.6	2.85	26.9231	4.38486	-1
4	4	4	4.3	4	4	4	4.1		0.025	4	4.1	3.35	14.1026	3.92428	-1.60206
5	4.7	4.4	4.5	4.5	4.5	4.7	4.5		CK	4.7	4.5	3.9	0	#NUM!	#VALUE!
1.3	1.3	1.3	1.2	1.3	1.1	1.3	1.2	6	6.4	1.3	1.2	0.55	92.1986	6.41856	0.80618	5.07073	1.41517	-0.049981	0.89129			0.983755	0.967775
2.5	2.7	2.6	2.4	2.8	2.3	2.6	2.5		1.6	3.7	3.5	2.9	58.8652	5.22408	0.20412
5.7	5.7	5.7	5.7	5.7	5.7	5.7	5.7		0.4	5.7	5.7	5	29.078	4.44889	-0.39794
7.5	7.5	7.2	7.4	7.4	7.4	7.4	7.4		0.1	7.4	7.4	6.7	4.96454	3.3517	-1
7.7	7.7	7.4	7.6	7.7	7.8	7.6	7.7		0.025	7.4	7.7	6.85	2.83688	3.09467	-1.60206
7.8	7.8	7.8	7.7	7.7	7.7	7.8	7.7		CK	7.8	7.7	7.05	0	#NUM!	#VALUE!
1.3	1.3	1.3	1.4	1.4	1.4	1.3	1.4	7	6.4	1.3	1.4	0.65	91.2162	6.35419	0.80618	5.20354	1.03603	-0.196458	0.636124			0.96141	0.92431
4	4	4	4.3	4.3	4.3	4	4.3		1.6	4	4.3	3.45	53.3784	5.08478	0.20412
4.9	5	5.1	5.3	5.2	5.1	5	5.2		0.4	5	5.2	4.4	40.5405	4.76062	-0.39794
7	7	7	7	7	7	7	7		0.1	7	7	6.3	14.8649	3.95775	-1
7.3	7.5	7.4	7.1	7.1	7.1	7.4	7.1		0.025	7.4	7.1	6.55	11.4865	3.79894	-1.60206
8.2	8	7.8	8.2	8.2	8.2	8	8.2		CK	8	8.2	7.4	0	#NUM!	#VALUE!
1.7	1.7	1.7	1.8	1.8	1.8	1.7	1.8	8	6.4	1.7	1.8	1.05	86.0927	6.08449	0.80618	5.00828	0.96556	-0.00857941	0.980439			0.956394	0.91469
4.5	4.4	4	4.2	4.2	4.2	4.3	4.2		1.6	4.3	4.2	3.55	52.9801	5.07477	0.20412
6.9	6.5	6.7	6.4	6.4	6.4	6.7	6.4		0.4	6.7	6.4	5.85	22.5166	4.24514	-0.39794
7	7	7.6	6.9	6.9	6.9	7.2	6.9		0.1	7.2	6.9	6.35	15.894	4.00118	-1
7.3	7.3	7.3	7.6	7.7	7.8	7.3	7.7		0.025	7.3	7.7	6.8	9.93377	3.71467	-1.60206
8.2	8.2	8.2	8.3	8.3	8.3	8.2	8.3		CK	8.2	8.3	7.55	0	#NUM!	#VALUE!
2	2	2	2.2	2.2	2.2	2	2.2	9	6.4	2	2.2	1.4	76.2712	5.71505	0.80618	4.87218	0.803498	0.159075	1.44236			0.963526	0.928382
3.5	3.7	3.6	3.4	3.8	3.9	3.6	3.7		1.6	3.6	3.7	2.95	50	5	0.20412
5.7	5.1	5.4	5.3	5.2	5.1	5.4	5.2		0.4	5.4	5.2	4.6	22.0339	4.22895	-0.39794
5.5	5.2	5.2	5.8	6	6.2	5.3	6		0.1	5.2	6	4.9	16.9492	4.04382	-1
5.6	5.7	5.8	6.2	6.1	6.3	5.7	6.2		0.025	5.7	6.2	5.25	11.0169	3.77437	-1.60206
6.6	6.6	6.6	6.6	6.6	6.6	6.6	6.6		CK	6.6	6.6	5.9	0	#NUM!	#VALUE!
1.1	1.1	1.1	1.2	1.2	1.2	1.1	1.2	11	6.4	1.1	1.2	0.45	92.6829	6.45258	0.80618	5.17649	1.35657	-0.130097	0.741144			0.972119	0.945016
2.5	2.7	2.9	2.4	2	2.2	2.7	2.2		1.6	2.7	2.2	1.75	71.5447	5.56937	0.20412
5.9	5.9	6.2	5.4	5.4	5.4	6	5.4		0.4	6	5.4	5	18.6992	4.11096	-0.39794
6.3	6.3	6.3	6	6	6	6.3	6		0.1	6.3	6	5.45	11.3821	3.79355	-1
6.7	6.7	6.7	6.4	6.6	6.5	6.7	6.5		0.025	6.7	6.5	5.9	4.06504	3.25681	-1.60206
6.9	6.9	6.9	6.8	6.8	6.8	6.9	6.8		CK	6.9	6.8	6.15	0	#NUM!	#VALUE!
1	1	1.3	1	1	1	1.1	1	13	6.4	1.1	1	0.35	94.4	6.58927	0.80618	5.94963	0.688261	-1.37975	0.0417114			0.974222	0.949109
1.5	1.5	1.5	1.5	1.5	1.5	1.5	1.5		1.6	1.5	1.5	0.8	87.2	6.1359	0.20412
2.9	2.5	2.7	2.5	2.5	2.5	2.7	2.5		0.4	2.7	2.5	1.9	69.6	5.51293	-0.39794
3.6	3.6	3.6	3.5	3.5	3.5	3.6	3.5		0.1	3.6	3.5	2.85	54.4	5.11052	-1
4	3.9	3.8	3.6	3.6	3.6	3.9	3.6		0.025	3.9	3.6	3.05	51.2	5.03008	-1.60206
6.9	7	6.8	7	7	7	6.9	7		CK	6.9	7	6.25	0	#NUM!	#VALUE!
1.6	1.6	1.6	1.4	1.4	1.4	1.6	1.4	14	6.4	1.6	1.4	0.8	82.7957	5.94612	0.80618	5.2399	0.801634	-0.299259	0.502043			0.975182	0.95098
2.2	2.2	2.2	2.1	2	1.9	2.2	2		1.6	2.2	2	1.4	69.8925	5.52131	0.20412
3.6	3.6	3.6	3.6	3.6	3.6	3.6	3.6		0.4	3.6	3.6	2.9	37.6344	4.6849	-0.39794
4	4	4	4.5	4.3	4.4	4	4.4		0.1	4	4.4	3.5	24.7312	4.31703	-1
4.6	4.4	4.5	4.4	4.4	4.4	4.5	4.4		0.025	4.5	4.4	3.75	19.3548	4.13511	-1.60206
5.5	5.5	5.5	5.3	5.3	5	5.5	5.2		CK	5.5	5.2	4.65	0	#NUM!	#VALUE!
2	2	1.7	1.6	1.6	1.6	1.9	1.6	15	6.4	1.9	1.6	1.05	79.2079	5.81366	0.80618	5.22654	0.841539	-0.269201	0.53802			0.979486	0.959393
2.5	2.7	2.6	2.4	2.2	2.3	2.6	2.3		1.6	2.6	2.3	1.75	65.3465	5.39469	0.20412
2.9	2.6	2.9	3	3	3	2.8	3		0.4	2.8	3	2.2	56.4356	5.16202	-0.39794
4.7	4.7	4.7	4.6	4.6	4.6	4.7	4.6		0.1	4.7	4.6	3.95	21.7822	4.22043	-1
5	5	5	5.2	5.1	5.3	5	5.2		0.025	5	5.2	4.4	12.8713	3.8675	-1.60206
6	5.5	6.2	5.8	5.2	5.8	5.9	5.6		CK	5.9	5.6	5.05	0	#NUM!	#VALUE!
0.71	0.71	0.71	0.71	0.71	0.71	0.71	0.71	16	6.4	0.71	0.71	0.01	99.8425	7.95275	0.80618	6.35315	1.34732	-1.00433	0.0990078			0.952649	0.907541
1.5	1.7	1.9	1.6	1.6	1.6	1.7	1.6		1.6	1.7	1.6	0.95	85.0394	6.03812	0.20412
2.2	2.2	2.2	2.3	2.3	2.3	2.2	2.3		0.4	2.2	2.3	1.55	75.5906	5.69319	-0.39794
3.3	3.4	3.5	3.5	3.5	3.5	3.4	3.5		0.1	3.4	3.5	2.75	56.6929	5.16856	-1
5.4	5.3	5.6	5.5	5.5	5.5	5.43333	5.5		0.025	5.4	5.5	4.75	25.1969	4.33169	-1.60206
7.1	7.1	7.1	7	7	7	7.1	7		CK	7.1	7	6.35	0	#NUM!	#VALUE!
0.71	0.71	0.71	0.71	0.71	0.71	0.71	0.71	17	6.4	0.71	0.71	0.01	99.8113	7.89649	0.80618	6.32084	1.43197	-0.922396	0.119565			0.954307	0.910701
1.1	1.1	1.1	1.1	1.1	1.1	1.1	1.1		1.6	1.1	1.1	0.4	92.4528	6.43621	0.20412
3.1	3.4	3.4	3	3	3	3.3	3		0.4	3.3	3	2.45	53.7736	5.09473	-0.39794
3.3	3.3	3.3	3.2	3.2	3.2	3.3	3.2		0.1	3.3	3.2	2.55	51.8868	5.04731	-1
4.8	4.9	5	4.6	4.7	4.5	4.9	4.6		0.025	4.9	4.6	4.05	23.5849	4.28028	-1.60206
6	6	6	6	6	6	6	6		CK	6	6	5.3	0	#NUM!	#VALUE!
0.71	0.71	0.71	0.71	0.71	0.71	0.71	0.71	18	6.4	0.71	0.71	0.01	99.8675	8.00578	0.80618	6.29739	1.51882	-0.854206	0.139892			0.95564	0.913248
1.5	1.5	1.5	1.4	1.3	1.2	1.5	1.3		1.6	1.5	1.3	0.7	90.7285	6.32422	0.20412
3.3	3.6	3.6	3.7	3.7	3.7	3.5	3.7		0.4	3.5	3.7	2.9	61.5894	5.29471	-0.39794
5.9	5.9	5.9	6	6	6	5.9	6		0.1	5.9	6	5.25	30.4636	4.48889	-1
6.5	6.4	6.3	6.3	6.3	6	6.4	6.2		0.025	6.4	6.2	5.6	25.8278	4.35134	-1.60206
8.2	8.2	8.2	8.3	8.3	8.3	8.2	8.3		CK	8.2	8.3	7.55	0	#NUM!	#VALUE!
0.8	0.8	0.8	0.8	0.8	0.8	0.8	0.8	25	6.4	0.8	0.8	0.1	98.6842	7.22152	0.80618	5.82705	1.50928	-0.547978	0.283154			0.977047	0.95462
1.4	1.4	1.4	1.5	1.6	1.7	1.4	1.6		1.6	1.4	1.6	0.8	89.4737	6.25212	0.20412
5.6	5.5	5.7	5.3	5.3	5.3	5.6	5.3		0.4	5.6	5.3	4.75	37.5	4.68136	-0.39794
6.4	6.4	6.4	6.3	6.3	6.3	6.4	6.3		0.1	6.4	6.3	5.65	25.6579	4.34607	-1
7.6	7.6	7.9	7.6	7.6	7.6	7.7	7.6		0.025	7.7	7.6	6.95	8.55263	3.63117	-1.60206
8.3	8.3	8.3	8.3	8.3	8.3	8.3	8.3		CK	8.3	8.3	7.6	0	#NUM!	#VALUE!
0.71	0.71	0.71	0.71	0.71	0.71	0.71	0.71	26	6.4	0.71	0.71	0.01	99.871	8.01372	0.80618	6.18369	1.56331	-0.757172	0.174915			0.956975	0.915801
2	2	2	2	2	2	2	2		1.6	2	2	1.3	83.2258	5.96313	0.20412
3.8	3.8	3.8	3.7	3.7	3.7	3.8	3.7		0.4	3.8	3.9	3.15	59.3548	5.23668	-0.39794
5.7	5.7	5.7	5.8	5.8	5.8	5.7	5.8		0.1	5.7	5.8	5.05	34.8387	4.61032	-1
7.3	7.3	7.3	7.2	7.2	7.2	7.3	7.2		0.025	7.3	7.2	6.55	15.4839	3.9841	-1.60206
8.4	8.4	8.4	8.5	8.5	8.5	8.4	8.5		CK	8.4	8.5	7.75	0	#NUM!	#VALUE!
0.9	0.9	0.9	0.8	0.9	0.85	0.9	0.85	27	6.4	0.9	0.85	0.175	96.6825	6.83605	0.80618	5.18319	1.50449	-0.121766	0.7555			0.964486	0.930233
3.2	3.2	3.2	3.1	3.1	3.1	3.2	3.1		1.6	3.2	3.1	2.45	53.5545	5.08922	0.20412
4.6	4.6	4.6	4.3	4.35	4.1	4.6	4.25		0.4	4.6	4.25	3.725	29.3839	4.4578	-0.39794
5.6	5.6	5.6	5.7	5.8	5.9	5.6	5.8		0.1	5.6	5.8	5	5.21327	3.37548	-1
5.8	5.8	5.8	5.8	5.8	5.8	5.8	5.8		0.025	5.8	5.8	5.1	3.31754	3.16395	-1.60206
6	6	6	6	5.95	5.9	6	5.95		CK	6	5.95	5.275	0	#NUM!	#VALUE!
2.2	2.6	2.7	2.3	2.3	2.3	2.5	2.3	29	6.4	2.5	2.3	1.7	76.5517	5.72416	0.80618	5.04656	0.691352	-0.0673408	0.856366			0.985576	0.971361
4	4	4	4.2	4.2	4.2	4	4.2		1.6	4	4.2	3.4	53.1034	5.07787	0.20412
5.1	5.1	5.1	5	5	5	5.1	5		0.4	5.1	5	4.35	40	4.74665	-0.39794
6	6.4	6.2	6.4	6.4	6.4	6.2	6.4		0.1	6.2	6.4	5.6	22.7586	4.25318	-1
6.5	6.6	6.7	6.8	6.8	6.8	6.6	6.8		0.025	6.6	6.8	6	17.2414	4.05533	-1.60206
7.6	7.8	8	8	8.2	8.1	7.8	8.1		CK	7.8	8.1	7.25	0	#NUM!	#VALUE!
1.4	1.4	1.4	1.4	1.5	1.3	1.4	1.4	31	6.4	1.4	1.4	0.7	84.6154	6.02008	0.80618	5.22204	0.854324	-0.259904	0.549663			0.992732	0.985517
2.6	2.6	2.6	2.5	2.5	2.5	2.6	2.5		1.6	2.6	2.5	1.85	59.3407	5.23632	0.20412
3.2	3.2	3.2	3.1	3.1	3.1	3.2	3.1		0.4	3.2	3.1	2.45	46.1538	4.90344	-0.39794
3.8	4	3.9	4	4.3	4.3	3.9	4.2		0.1	3.9	4.2	3.35	26.3736	4.36813	-1
4.5	4.5	4.5	4.8	4.7	4.9	4.5	4.8		0.025	4.5	4.8	3.95	13.1868	3.8824	-1.60206
5.3	5.3	5.3	5.2	5.2	5.2	5.3	5.2		CK	5.3	5.2	4.55	0	#NUM!	#VALUE!
0.8	0.8	0.8	0.8	0.8	0.8	0.8	0.8	32	6.4	0.8	0.8	0.1	98.2609	7.11088	0.80618	5.76024	1.37044	-0.55474	0.278779			0.981278	0.962907
1.6	1.8	1.7	1.6	1.6	1.6	1.7	1.6		1.6	1.7	1.6	0.95	83.4783	5.97324	0.20412
3.6	3.9	3.6	3.8	4.1	4.1	3.7	4		0.4	3.7	4	3.15	45.2174	4.87983	-0.39794
5.1	5.1	5.1	5.1	5.1	5.1	5.1	5.1		0.1	5.1	5.1	4.4	23.4783	4.27681	-1
5.7	5.7	5.7	5.7	5.9	5.8	5.7	5.8		0.025	5.7	5.8	5.05	12.1739	3.83366	-1.60206
6.5	6.5	6.5	6.4	6.4	6.4	6.5	6.4		CK	6.5	6.4	5.75	0	#NUM!	#VALUE!
1.5	1.3	1.4	1.5	1.6	1.7	1.4	1.6	33	6.4	1.4	1.6	0.8	83.1579	5.96042	0.80618	5.29561	0.621365	-0.475739	0.334396			0.967794	0.936625
2.3	2.4	2.2	2.5	2.6	2.7	2.3	2.6		1.6	2.3	2.6	1.75	63.1579	5.33604	0.20412
3.3	3.3	3.3	3.5	3.5	3.5	3.3	3.5		0.4	3.3	3.5	2.7	43.1579	4.82764	-0.39794
3.6	3.6	3.6	3.6	3.6	3.6	3.6	3.6		0.1	3.6	3.6	2.9	38.9474	4.71931	-1
4	4.1	4.2	4	4.3	4.3	4.1	4.2		0.025	4.1	4.2	3.45	27.3684	4.39829	-1.60206
5.9	5.9	5.9	6	6	6	5.9	6		CK	5.9	5	4.75	0	#NUM!	#VALUE!
1.3	1.3	1.3	1.2	1.2	1.2	1.3	1.2	34	6.4	1.3	1.2	0.55	87.0588	6.12918	0.80618	5.43238	0.88533	-0.488382	0.324801			0.999641	0.999281
1.8	1.8	1.5	1.9	2.1	1.7	1.7	1.9		1.6	1.7	1.9	1.1	74.1176	5.64698	0.20412
2.7	2.7	2.7	2.7	2.7	2.7	2.7	2.7		0.4	2.7	2.7	2	52.9412	5.07379	-0.39794
3.5	3.5	3.5	3.6	3.7	3.8	3.5	3.7		0.1	3.5	3.7	2.9	31.7647	4.52571	-1
4.3	4.3	4.3	4.2	4.2	4.2	4.3	4.2		0.025	4.3	4.2	3.55	16.4706	4.0247	-1.60206
4.9	4.9	4.9	5	5	5	4.9	5		CK	4.9	5	4.25	0	#NUM!	#VALUE!
0.8	0.8	0.8	0.71	0.71	0.71	0.8	0.71	35	6.4	0.8	0.71	0.055	99.0678	7.35257	0.80618	6.04605	1.21989	-0.857496	0.138837			0.965927	0.933016
2	2	2	1.9	1.7	1.8	2	1.8		1.6	2	1.8	1.2	79.661	5.82957	0.20412
2	2	2.3	2.2	2.2	2.2	2.1	2.2		0.4	2.1	2.2	1.45	75.4237	5.68788	-0.39794
4.5	4.7	4.6	4.2	4.4	4	4.6	4.2		0.1	4.6	4.2	3.7	37.2881	4.67577	-1
5.2	5.2	5.2	5.3	5	5.6	5.2	5.3		0.025	5.2	5.3	4.55	22.8814	4.25724	-1.60206
6.5	6.5	6.5	6.5	6.8	6.8	6.5	6.7		CK	6.5	6.7	5.9	0	#NUM!	#VALUE!
0.8	0.8	0.8	0.71	0.71	0.71	0.8	0.71	36	6.4	0.8	0.71	0.055	98.4722	7.16281	0.80618	5.80669	1.27144	-0.634471	0.232022			0.968584	0.938156
1.3	1.4	1.8	1.3	1.2	1.1	1.5	1.2		1.6	1.5	1.2	0.65	81.9444	5.91325	0.20412
2.5	2.5	2.2	2.7	2.9	2.8	2.4	2.8		0.4	2.4	2.8	1.9	47.2222	4.93032	-0.39794
3	3.2	2.8	3.5	3.7	3.6	3.6	3.6		0.1	3	3.6	2.6	27.7778	4.41054	-1
3.5	3.7	3.3	3.8	3.8	3.8	3.5	3.8		0.025	3.5	3.8	2.95	18.0556	4.08675	-1.60206
4.2	4.2	4.2	4.4	4.4	4.4	4.2	4.4		CK	4.2	4.4	3.6	0	#NUM!	#VALUE!
1.6	1.6	1.6	1.6	1.6	1.6	1.6	1.6	37	6.4	1.6	1.6	0.9	86.7647	6.11534	0.80618	5.4756	0.858419	-0.55404	0.279228			0.971306	0.943436
2	2.5	2.4	2.4	2.7	2.7	2.3	2.6		1.6	2.3	2.6	1.75	74.2647	5.65153	0.20412
3.9	4.2	3.9	3.9	3.9	3.6	4	3.8		0.4	4	3.8	3.2	52.9412	5.07379	-0.39794
4.4	4.4	4.4	4.2	4.1	4	4.4	4.1		0.1	4.4	4.1	3.55	47.7941	4.94468	-1
6.7	6.4	7	6.5	6.5	6.5	6.7	6.5		0.025	6.7	6.5	5.9	13.2353	3.88466	-1.60206
7.5	7.5	7.5	7.5	7.5	7.5	7.5	7.5		CK	7.5	7.5	6.8	0	#NUM!	#VALUE!
0.8	0.8	0.8	0.71	0.71	0.71	0.8	0.71	38	6.4	1.3	1.4	0.65	86.0215	6.08129	0.80618	5.46862	0.887873	-0.527799	0.29662			0.972146	0.945068
1.5	1.5	1.5	1.5	1.5	1.5	1.5	1.5		1.6	1.5	1.5	0.8	82.7957	5.94612	0.20412
3	3.3	3.3	3	3	3	3.2	3		0.4	3.2	3	2.4	48.3871	4.95956	-0.39794
4	4	4	4	4.2	4.1	4	4.1		0.1	4	4.1	3.35	27.957	4.41588	-1
4.1	4.2	4.6	4.5	4.5	4.5	4.3	4.5		0.025	4.3	4.5	3.7	20.4301	4.17364	-1.60206
5.5	5.5	5.5	5.4	5.1	5.1	5.5	5.2		CK	5.5	5.2	4.65	0	#NUM!	#VALUE!
0.71	0.71	0.71	0.71	0.71	0.71	0.71	0.71	39	6.4	0.71	0.71	0.01	99.8198	7.91093	0.80618	6.64868	1.41404	-1.16594	0.0682438			0.968444	0.937885
1	1	1.3	1	1	1	1.1	1		1.6	1.1	1	0.35	93.6937	6.52956	0.20412
1.3	1.2	1.1	1.3	1.3	1.6	1.2	1.4		0.4	1.2	1.4	0.6	89.1892	6.23665	-0.39794
2.1	2.1	2.1	2.1	2.1	2.1	2.1	2.1		0.1	2.1	2.1	1.4	74.7748	5.66742	-1
5.2	5.2	5.2	5.3	5.3	5.3	5.2	5.3		0.025	5.2	5.3	4.55	18.018	4.08532	-1.60206
6.2	6.2	6.2	6.3	6.3	6.3	6.2	6.3		CK	6.2	6.3	5.55	0	#NUM!	#VALUE!
0.8	0.8	0.8	0.8	0.8	0.8	0.8	0.8	40	6.4	0.8	0.8	0.1	98.6755	7.21895	0.80618	5.66734	1.44368	-0.462245	0.344949			0.97014	0.941171
2.5	2.5	2.5	2.5	2.5	2.5	2.5	2.5		1.6	2.5	2.5	1.8	76.1589	5.71142	0.20412
5	5.3	5.3	5	5	5	5.2	5		0.4	5.2	5	4.4	41.7219	4.79099	-0.39794
7	7	7.3	7	6.7	7	7.1	6.9		0.1	7.1	6.9	6.3	16.5563	4.02815	-1
7.5	7.5	7.5	7.5	7.5	7.5	7.5	7.5		0.025	7.5	7.5	6.8	9.93377	3.71467	-1.60206
8.3	8.3	8.3	8.2	8.2	8.2	8.3	8.2		CK	8.3	8.2	7.55	0	#NUM!	#VALUE!
0.8	0.8	0.8	0.8	0.8	0.8	0.8	0.8	41	6.4	1.7	1.7	1	86.6667	6.11077	0.80618	5.16111	0.996935	-0.16161	0.689271			0.981483	0.963309
2.5	2.5	2.5	2.5	2.5	2.5	2.5	2.5		1.6	3	3.7	2.65	64.6667	5.37634	0.20412
5	5.3	5.3	5	5	5	5.2	5		0.4	5.9	5.9	5.2	30.6667	4.49468	-0.39794
7	7	7.3	7	6.7	7	7.1	6.9		0.1	7.1	6.6	6.15	18	4.08463	-1
7.5	7.5	7.5	7.5	7.5	7.5	7.5	7.5		0.025	7.5	7.3	6.7	10.6667	3.75555	-1.60206
8.3	8.3	8.3	8.2	8.2	8.2	8.3	8.2		CK	8.2	8.2	7.5	0	#NUM!	#VALUE!
2.2	2.2	2.2	2.2	2.2	2.2	2.2	2.2	42	6.4	2.2	2.2	1.5	74.7899	5.66789	0.80618	5.02907	0.722244	-0.0402547	0.911476			0.981457	0.963257
3	3.3	3.3	3.1	3.1	3.1	3.2	3.1		1.6	3.2	3.1	2.45	58.8235	5.22301	0.20412
4.5	4.5	4.5	4.5	4.5	4.5	4.5	4.5		0.4	4.5	4.5	3.8	36.1345	4.64513	-0.39794
5.5	5.5	5.5	5.5	5.5	5.5	5.5	5.5		0.1	5.5	5.5	4.8	19.3277	4.13412	-1
5.6	5.7	5.8	5.6	5.6	5.6	5.7	5.6		0.025	5.7	5.6	4.95	16.8067	4.03817	-1.60206
6.6	6.6	6.9	6.6	6.6	6.6	6.7	6.6		CK	6.7	6.6	5.95	0	#NUM!	#VALUE!
1.4	1.5	1.9	1.3	1.5	1.4	1.6	1.4	54	6.4	1.6	1.4	0.8	82.2222	5.92387	0.80618	5.11255	0.972217	-0.115764	0.766013			0.978388	0.957242
2.2	2.3	2.7	2.1	2.1	2.1	2.4	2.1		1.6	2.4	2.1	1.55	65.5556	5.40036	0.20412
3.5	3.5	3.5	3.7	3.4	3.7	3.5	3.6		0.4	3.4	3.6	2.8	37.7778	4.68868	-0.39794
4.7	4.7	4.7	4.6	4.6	4.6	4.7	4.6		0.1	4.7	4.6	3.95	12.2222	3.83605	-1
4.7	4.7	4.7	4.7	4.7	4.7	4.7	4.7		0.025	4.7	4.7	4	11.1111	3.77936	-1.60206
5	5	5.3	5.3	5.3	5.3	5.1	5.3		CK	5.1	5.3	4.5	0	#NUM!	#VALUE!
1.5	1.5	1.5	1.5	1.5	1.5	1.5	1.5	55	6.4	1.5	1.5	0.8	85.1852	6.04441	0.80618	5.59445	0.627683	-0.947057	0.112965			0.972071	0.944923
2.1	2.1	2.1	2	2	2	2.1	2		1.6	2.1	2	1.35	75	5.67449	0.20412
2.5	2.5	2.5	2.5	2.5	2.5	2.5	2.5		0.4	2.5	2.5	1.8	66.6667	5.43073	-0.39794
2.7	2.8	3.2	3.2	3.2	3.2	2.9	3.2		0.1	2.9	3.2	2.35	56.4815	5.16319	-1
4.6	4.6	4.6	4.6	4.6	4.6	4.6	4.6		0.025	4.6	4.6	3.9	27.7778	4.41054	-1.60206
6	5.8	6.2	6.2	6.2	6.2	6	6.2		CK	6	6.2	5.4	0	#NUM!	#VALUE!
1.8	1.8	1.8	1.8	1.8	1.8	1.8	1.8	56	6.4	1.8	1.8	1.1	74.7126	5.66547	0.80618	5.07961	0.635063	-0.125357	0.749278			0.963566	0.92846
2.4	2.4	2.7	2.3	2	2.3	2.5	2.2		1.6	2.5	2.2	1.65	62.069	5.30729	0.20412
3.6	3.8	3.7	3.5	3.5	3.5	3.7	3.5		0.4	3.7	3.5	2.9	33.3333	4.56927	-0.39794
4	4	4	3.9	3.6	3.9	4	3.8		0.1	4	3.8	3.2	26.4368	4.37006	-1
4.2	4.2	4.2	4	4	4	4.2	4		0.025	4.2	4	3.4	21.8391	4.22236	-1.60206
5.1	5.1	5.1	5.1	4.9	5	5.1	5		CK	5.1	5	4.35	0	#NUM!	#VALUE!
1.3	1	1.6	1.5	1.2	1.2	1.3	1.3	58	6.4	1.3	1.3	0.6	86.0465	6.08241	0.80618	5.12158	1.00862	-0.120541	0.757633			0.970709	0.942277
2.3	2.3	2.3	2.3	2.3	2.3	2.3	2.3		1.6	2.3	2.3	1.6	62.7907	5.32631	0.20412
3.6	3.6	3.6	3.5	3.5	3.5	3.6	3.5		0.4	3.6	3.5	2.85	33.7209	4.57991	-0.39794
4.5	4.5	4.5	4.5	4.5	4.5	4.5	4.5		0.1	4.5	4.5	3.8	11.6279	3.8062	-1
4.5	4.5	4.8	4.5	4.4	4.3	4.6	4.4		0.025	4.6	4.4	3.8	11.6279	3.8062	-1.60206
5	5	5	5	5	5	5	5		CK	5	5	4.3	0	#NUM!	#VALUE!
0.71	0.71	0.71	0.71	0.71	0.71	0.71	0.71	59	6.4	0.71	0.71	0.01	99.7619	7.82271	0.80618	5.96182	1.5672	-0.613718	0.243378			0.952542	0.907337
1.6	1.7	2.1	1.6	1.5	2	1.8	1.7		1.6	1.8	1.7	1.05	75	5.67449	0.20412
2.8	2.8	2.8	2.8	2.8	2.8	2.8	2.8		0.4	2.8	2.8	2.1	50	5	-0.39794
3.6	3.8	3.7	3.5	3.5	3.5	3.7	3.5		0.1	3.7	3.5	2.9	30.9524	4.5028	-1
4.8	4.6	4.4	4.5	4.4	4.3	4.6	4.4		0.025	4.6	4.4	3.8	9.52381	3.69083	-1.60206
4.9	4.9	4.9	4.9	4.9	4.9	4.9	4.9		CK	4.9	4.9	4.2	0	#NUM!	#VALUE!
3.2	3	3.1	2.9	2.9	2.9	3.1	2.9	60	6.4	3.1	2.9	2.3	65.6716	5.40352	0.80618	4.56827	0.800696	0.539191	3.46092			0.977612	0.955726
5.1	5.3	4.9	5.3	5.3	5.3	5.1	5.3		1.6	5.1	5.3	4.5	32.8358	4.55555	0.20412
6	6	6	6	6	6	6	6		0.4	6	6	5.3	20.8955	4.18995	-0.39794
6.8	6.8	6.8	6.8	6.8	6.8	6.8	6.8		0.1	6.8	6.8	6.1	8.95522	3.65648	-1
7	7	7	7	7	7	7	7		0.025	7	7	6.3	5.97015	3.44272	-1.60206
7.4	7.4	7.4	7.4	7.4	7.4	7.4	7.4		CK	7.4	7.4	6.7	0	#NUM!	#VALUE!
1.6	1.9	1.6	1.6	1.5	1.7	1.7	1.6	61	6.4	1.7	1.6	0.95	77.6471	5.76033	0.80618	5.05811	0.972739	-0.0597425	0.87148			0.950281	0.903033
2.4	2.5	2.3	2.2	2.2	2.2	2.4	2.2		1.6	2.4	2.2	1.6	62.3529	5.31476	0.20412
2.4	2.7	2.7	3	3.4	2.9	2.6	3.1		0.4	2.6	3.1	2.15	49.4118	4.98525	-0.39794
4.6	4.6	4.6	4.6	4.6	4.6	4.6	4.6		0.1	4.6	4.6	3.9	8.23529	3.61058	-1
4.5	4.3	4.7	4.6	4.6	4.6	4.5	4.6		0.025	4.5	4.6	3.85	9.41176	3.68418	-1.60206
4.9	4.9	4.9	5	5	5	4.9	5		CK	4.9	5	4.25	0	#NUM!	#VALUE!
0.8	0.8	0.8	0.71	0.8	0.75	0.8	0.753333	62	6.4	0.8	0.75	0.075	98.7805	7.25093	0.80618	5.42676	1.59182	-0.268093	0.539395			0.960399	0.922365
2.9	2.8	3	3	3.2	3.4	2.9	3.2		1.6	2.9	3.2	2.35	61.7886	5.29993	0.20412
4.9	4.9	4.9	5	5.3	5.3	4.9	5.2		0.4	4.9	5.2	4.35	29.2683	4.45444	-0.39794
6.3	6.3	6	6.3	6	6.6	6.2	6.3		0.1	6.2	6.3	5.55	9.7561	3.70443	-1
6.6	6.6	6.6	6.6	6.6	6.6	6.6	6.6		0.025	6.6	6.6	5.9	4.06504	3.25681	-1.60206
6.9	7.1	7	6.9	6.6	6.6	7	6.7		CK	7	6.7	6.15	0	#NUM!	#VALUE!
1.1	1.1	1.1	1	1	1	1.1	1	63	6.4	1.1	1	0.35	93.3333	6.50109	0.80618	5.63067	0.820176	-0.768941	0.170239			0.962951	0.927275
1.9	1.9	1.9	2	2	1.7	1.9	1.9		1.6	1.9	1.9	1.2	77.1429	5.74356	0.20412
3.1	3.5	3	3.4	3.4	3.4	3.2	3.4		0.4	3.2	3.4	2.6	50.4762	5.01194	-0.39794
3.9	3.9	3.9	3.9	3.9	3.9	3.9	3.9		0.1	3.9	3.9	3.2	39.0476	4.72192	-1
4.3	4.3	4.3	4.2	4.2	4.2	4.3	4.2		0.025	4.3	4.2	3.55	32.381	4.54293	-1.60206
6	6	6	5.9	5.9	5.9	6	5.9		CK	6	5.9	5.25	0	#NUM!	#VALUE!
0.8	0.8	0.8	0.71	0.71	0.71	0.8	0.71	64	6.4	0.8	0.71	0.055	99.0756	7.35571	0.80618	6.07212	1.20346	-0.890871	0.128567			0.956127	0.91418
1.3	1.3	1.3	1.3	1.3	1.3	1.3	1.3		1.6	1.3	1.3	0.6	89.916	6.27678	0.20412
3.6	3.6	3.6	3.5	3.2	3.5	3.6	3.4		0.4	3.6	3.4	2.8	52.9412	5.07379	-0.39794
4.2	4.2	4.2	4.2	4.2	4.2	4.2	4.2		0.1	4.2	4.2	3.5	41.1765	4.77699	-1
4.8	4.8	4.8	4.8	5.1	4.8	4.8	4.9		0.025	4.8	4.9	4.15	30.2521	4.48284	-1.60206
6.6	7.2	6.6	6.5	6.5	6.5	6.8	6.5		CK	6.8	6.5	5.95	0	#NUM!	#VALUE!
0.8	0.8	0.8	0.8	0.8	0.8	0.8	0.8	65	6.4	0.8	0.8	0.1	98.0769	7.0699	0.80618	5.8515	1.46054	-0.583001	0.261215			0.955111	0.912238
1	1	1	1	1	1	1	1		1.6	1	1	0.3	94.2308	6.57444	0.20412
3.8	3.7	4.2	4	4.2	3.8	3.9	4		0.4	3.9	4	3.25	37.5	4.68136	-0.39794
4.9	4.9	4.9	4.9	4.9	4.9	4.9	4.9		0.1	4.9	4.9	4.2	19.2308	4.13058	-1
5.2	5.2	5.2	5.2	5.2	5.2	5.2	5.2		0.025	5.2	5.2	4.5	13.4615	3.89516	-1.60206
5.9	5.9	5.9	5.9	5.9	5.9	5.9	5.9		CK	5.9	5.9	5.2	0	#NUM!	#VALUE!
1.3	1.7	1.8	1.3	1.3	1.3	1.6	1.3	66	6.4	1.6	1.3	0.75	81.4815	5.89578	0.80618	5.13393	0.816353	-0.164063	0.685388			0.974386	0.949428
2.5	2.8	2.5	2.6	2.6	2.9	2.6	2.7		1.6	2.6	2.7	1.95	51.8519	5.04644	0.20412
2.7	3.1	2.6	3	3	3	2.8	3		0.4	2.8	3	2.2	45.679	4.89148	-0.39794
3.5	3.5	3.5	3.5	3.5	3.5	3.5	3.5		0.1	3.5	3.5	2.8	30.8642	4.5003	-1
4	4.3	4.3	4.4	4.6	4.5	4.2	4.5		0.025	4.2	4.5	3.65	9.87654	3.71138	-1.60206
4.5	4.6	5	4.7	5	4.7	4.7	4.8		CK	4.7	4.8	4.05	0	#NUM!	#VALUE!
1.5	1.5	1.5	1.5	1.9	1.7	1.5	1.7	67	6.4	1.5	1.7	0.9	78.8235	5.80031	0.80618	5.31986	0.746566	-0.428448	0.372865			0.984465	0.969172
1.6	1.9	1.6	1.8	1.8	1.8	1.7	1.8		1.6	1.7	1.8	1.05	75.2941	5.68377	0.20412
2.4	2.7	2.4	3.2	3.5	3.2	2.5	3.3		0.4	2.5	3.3	2.2	48.2353	4.95575	-0.39794
3.4	3.4	3.4	3.6	3.7	3.8	3.4	3.7		0.1	3.4	3.7	2.85	32.9412	4.55846	-1
4.1	4.1	4.1	4.2	4.2	4.2	4.1	4.2		0.025	4.1	4.2	3.45	18.8235	4.11558	-1.60206
4.9	4.9	4.9	5	5	5	4.9	5		CK	4.9	5	4.25	0	#NUM!	#VALUE!
0.71	0.71	0.71	0.71	0.71	0.71	0.71	0.71	69	6.4	0.71	0.71	0.01	99.7222	7.77292	0.80618	6.00031	1.5043	-0.664964	0.21629			0.950561	0.903567
1	1.5	1.4	1.2	1.6	1.4	1.3	1.4		1.6	1.3	1.4	0.65	81.9444	5.91325	0.20412
2.3	2.6	3.2	2.5	2.3	3	2.7	2.6		0.4	2.7	2.6	1.95	45.8333	4.89537	-0.39794
3	3.1	3.8	2.9	3.3	3.4	3.3	3.2		0.1	3.3	3.2	2.55	29.1667	4.45148	-1
3.7	3.7	3.7	3.5	3.9	4	3.7	3.8		0.025	3.7	3.8	3.05	15.2778	3.97541	-1.60206
5.9	5.9	5.9	5.9	5.9	5.9	5.9	5.9		CK	4.3	4.3	3.6	0	#NUM!	#VALUE!
1.7	1.9	2.4	1.5	1.6	1.7	2	1.6	70	6.4	2	1.6	1.1	69.863	5.52046	0.80618	4.88376	0.652386	0.178172	1.5072			0.984668	0.96957
2.4	2.5	3.5	2.3	2.6	2.3	2.8	2.4		1.6	2.8	2.4	1.9	47.9452	4.94847	0.20412
3	3.5	3.4	3	3	3	3.3	3		0.4	3.3	3	2.45	32.8767	4.55668	-0.39794
3.2	3.6	3.7	3.6	3.6	4.2	3.5	3.8		0.1	3.5	3.8	2.95	19.1781	4.12865	-1
3.8	3.8	3.8	3.8	3.8	3.8	3.8	3.8		0.025	3.8	3.8	3.1	15.0685	3.9665	-1.60206
4.3	4.3	4.6	4.3	4.3	4.3	4.4	4.3		CK	4.4	4.3	3.65	0	#NUM!	#VALUE!
0.71	0.71	0.71	0.71	0.71	0.71	0.71	0.71	71	6.4	0.71	0.71	0.01	99.8058	7.88747	0.80618	6.10219	1.74773	-0.63064	0.234078			0.983257	0.966794
1.3	1.3	1.3	1.3	1.4	1.5	1.3	1.4		1.6	1.3	1.4	0.65	87.3786	6.14447	0.20412
2.8	2.9	3.3	2.7	2.6	3.1	3	2.8		0.4	3	2.8	2.2	57.2816	5.18355	-0.39794
4.7	4.4	4.7	4.9	4.9	4.6	4.6	4.8		0.1	4.6	4.8	4	22.3301	4.23891	-1
5.2	5.2	5.2	5	4.7	5	5.2	4.9		0.025	5.2	4.9	4.75	7.76699	3.57908	-1.60206
5.9	5.9	5.9	5.8	5.8	5.8	5.9	5.8		CK	5.9	5.8	5.15	0	#NUM!	#VALUE!
1.1	1.4	1.1	1.2	1.2	1.2	1.2	1.2	75	6.4	1.2	1.2	0.5	88.3721	6.1938	0.80618	5.4277	1.04793	-0.408135	0.390719			0.99627	0.992553
1.8	1.8	1.8	1.8	1.8	1.8	1.8	1.8		1.6	1.8	1.8	1.1	74.4186	5.6563	0.20412
2.8	2.9	2.4	2.7	2.6	2.2	2.7	2.5		0.4	2.7	2.5	1.9	55.814	5.14625	-0.39794
3.5	4	3.6	4	4	4	3.7	4		0.1	3.7	4	3.15	26.7442	4.37943	-1
4.4	4.6	5.1	4.5	4.7	4.3	4.7	4.5		0.025	4.7	4.5	3.9	9.30233	3.67763	-1.60206
5	5	5	5	5	5	5	5		CK	5	5	4.3	0	#NUM!	#VALUE!
0.71	0.71	0.71	0.71	0.71	0.71	0.71	0.71	76	6.4	0.71	0.71	0.01	99.798	7.87499	0.80618	5.97941	1.61472	-0.60655	0.247429			0.954984	0.911995
1.8	1.8	1.8	1.7	1.7	1.7	1.8	1.7		1.6	1.8	1.7	1.05	78.7879	5.79908	0.20412
3.3	3	3.3	3.5	3.4	3	3.2	3.3		0.4	3.2	3.3	2.55	48.4848	4.96201	-0.39794
4.5	4.5	4.5	4.5	4.5	4.5	4.5	4.5		0.1	4.5	4.5	3.8	23.2323	4.26878	-1
5.2	5.2	5.2	5	5	5	5.2	5		0.025	5.2	5	4.4	11.1111	3.77936	-1.60206
5.6	5.5	5.4	5.8	5.8	5.8	5.5	5.8		CK	5.5	5.8	4.95	0	#NUM!	#VALUE!
1.3	1.7	1.8	1.5	1.5	1.8	1.6	1.6	77	6.4	1.6	1.6	0.9	78.0488	5.77384	0.80618	5.26718	0.493077	-0.541858	0.287172			0.973589	0.947875
2.3	2.3	2.3	2.3	2.5	3	2.3	2.6		1.6	2.3	2.6	1.75	57.3171	5.18445	0.20412
2.8	2.4	2.3	2.9	2.5	2.4	2.5	2.6		0.4	2.5	2.6	1.85	54.878	5.12258	-0.39794
3	3	3	3	3.3	3.3	3	3.2		0.1	3	3.2	2.4	41.4634	4.78436	-1
3.4	3.6	3.5	3.3	3.7	3.8	3.5	3.6		0.025	3.5	3.6	2.85	30.4878	4.48958	-1.60206
5.1	5	4.6	4.8	4.8	4.5	4.9	4.7		CK	4.9	4.7	4.1	0	#NUM!	#VALUE!
0.71	0.71	0.71	0.71	0.71	0.71	0.71	0.71	202	6.4	0.71	0.71	0.01	99.8592	7.98704	0.80618	6.1605	1.68599	-0.688318	0.204966			0.960723	0.922989
1.3	1.3	1.3	1.3	1.4	1.5	1.3	1.4		1.6	1.3	1.4	0.65	90.8451	6.33127	0.20412
4.5	4.5	4.5	4.4	4.4	4.4	4.5	4.4		0.4	4.5	4.4	3.75	47.1831	4.92933	-0.39794
5.7	6.4	6.2	6	6.4	6.5	6.1	6.3		0.1	6.1	6.3	5.5	22.5352	4.24576	-1
7	7	6.7	6.8	6.7	6.3	6.9	6.6		0.025	6.9	6.6	6.05	14.7887	3.95446	-1.60206
5.9	5.9	5.9	5.8	5.8	5.8	5.9	5.8		CK	8	7.6	7.1	0	#NUM!	#VALUE!
1.5	1.5	1.5	0.71	0.71	0.71	1.5	0.71	203	6.4	1.5	0.71	0.405	94.6358	6.61052	0.80618	5.25805	1.18768	-0.217271	0.606358			0.958758	0.919216
3.5	3.4	3.9	4.1	4	3.9	3.6	4		1.6	3.6	4	3.1	58.9404	5.22601	0.20412
6	6	6	6	6	6	6	6		0.4	6	6	5.3	29.8013	4.46988	-0.39794
7	7.3	7	7	7.3	7.3	7.1	7.2		0.1	7.1	7.2	6.45	14.5695	3.94492	-1
7.6	7.6	7.3	7.5	7.5	7.8	7.5	7.6		0.025	7.5	7.6	6.85	9.27152	3.67578	-1.60206
8.3	8.3	8.3	8.2	8.2	8.2	8.3	8.2		CK	8.3	8.2	7.55	0	#NUM!	#VALUE!
1.7	1.6	2.1	2.1	2.1	1.8	1.8	2	204	6.4	1.8	2	1.2	84	5.99446	0.80618	5.2009	0.732415	-0.274296	0.531746			0.964602	0.930457
3.7	3.3	3.2	4.5	4.1	3.4	3.4	4		1.6	3.4	4	3	60	5.25335	0.20412
5.4	5.4	5.4	5.4	5	5.5	5.4	5.3		0.4	5.4	5.3	4.65	38	4.69452	-0.39794
6	6.2	6.7	6.1	6	6.2	6.3	6.1		0.1	6.3	6.1	5.5	26.6667	4.37707	-1
6.3	6.4	6.8	6.3	6.5	7	6.5	6.6		0.025	6.5	6.6	5.85	22	4.22781	-1.60206
8.2	8.2	8.2	8.2	8.2	8.2	8.2	8.2		CK	8.2	8.2	7.5	0	#NUM!	#VALUE!
1.3	1.7	1.8	1.8	1.8	1.5	1.6	1.7	205	6.4	1.6	1.7	0.95	87.1622	6.13409	0.80618	5.10087	1.06927	-0.0943376	0.804753			0.962514	0.926434
3.2	3.4	3.3	3	3.3	3.3	3.3	3.2		1.6	3.3	3.2	2.55	65.5405	5.39996	0.20412
6.6	6.6	6.6	6.6	6.6	6.6	6.6	6.6		0.4	6.6	6.6	5.9	20.2703	4.16799	-0.39794
6.7	6.3	6.8	6.8	6.8	6.8	6.6	6.8		0.1	6.6	6.8	6	18.9189	4.11911	-1
7.5	7.5	7.8	7.5	7.5	7.5	7.6	7.5		0.025	7.6	7.5	6.85	7.43243	3.55568	-1.60206
8.1	8.1	7.8	8.1	8.3	8.2	8	8.2		CK	8	8.2	7.4	0	#NUM!	#VALUE!
0.71	0.71	0.71	0.71	0.71	0.71	0.71	0.71	206	6.4	0.71	0.71	0.01	99.6875	7.73437	0.80618	5.7283	1.73682	-0.419331	0.380776			0.957374	0.916564
1.6	1.3	1.6	1.6	1.5	1.7	1.5	1.6		1.6	1.5	1.6	0.85	73.4375	5.6261	0.20412
2.8	2.9	3.3	2.7	2.6	3.1	3	2.8		0.4	3	2.8	2.2	31.25	4.51122	-0.39794
3.7	3.4	3.7	3.5	3	3.1	3.6	3.2		0.1	3.6	3.2	2.7	15.625	3.99001	-1
3.7	3.7	4	4	3.6	3.5	3.8	3.7		0.025	3.8	3.7	3.05	4.6875	3.32406	-1.60206
4	4	4	3.8	3.8	3.8	4	3.8		CK	4	3.8	3.2	0	#NUM!	#VALUE!
1.2	1.6	1.7	1.3	1	1.3	1.5	1.2	207	6.4	1.5	1.2	0.65	87.8505	6.16754	0.80618	5.38419	0.835306	-0.459944	0.346782			0.993177	0.986401
2.1	2.5	2.6	2.6	2.5	2.4	2.4	2.5		1.6	2.4	2.5	1.75	67.2897	5.44793	0.20412
3.5	3.6	3.1	3.4	3.4	3.7	3.4	3.5		0.4	3.4	3.5	2.75	48.5981	4.96485	-0.39794
4.1	4.4	4.4	4	4	4.3	4.3	4.1		0.1	4.3	4.1	3.5	34.5794	4.6033	-1
5	5	5	5.2	5.2	5.2	5	5.2		0.025	5	5.2	4.4	17.757	4.07533	-1.60206
6	6	6	6.1	6.1	6.1	6	6.1		CK	6	6.1	5.35	0	#NUM!	#VALUE!
1.2	1.2	1.2	1.2	1.2	1.2	1.2	1.2	208	6.4	1.2	1.2	0.5	91.5966	6.37844	0.80618	5.57024	0.732711	-0.778258	0.166626			0.963969	0.929235
2.1	2	2.5	2.5	2.5	2.8	2.2	2.6		1.6	2.2	2.6	1.7	71.4286	5.56595	0.20412
3.3	3.6	3.3	3.3	3.3	3.3	3.4	3.3		0.4	3.4	3.3	2.65	55.4622	5.13735	-0.39794
4	4.4	4.2	4.9	4	4.6	4.2	4.5		0.1	4.2	4.5	3.65	38.6555	4.71169	-1
4.6	5	4.5	4.5	4.7	4.3	4.7	4.5		0.025	4.7	4.5	3.9	34.4538	4.59989	-1.60206
7	7	7	6.3	6.3	6.3	7	6.3		CK	7	6.3	5.95	0	#NUM!	#VALUE!
0.9	0.9	0.9	0.8	0.8	0.8	0.9	0.8	209	6.4	0.9	0.8	0.15	97.1429	6.90222	0.80618	5.87356	0.960363	-0.909617	0.123135			0.970839	0.942528
1.5	1.6	2	1.5	1.7	1.6	1.7	1.6		1.6	1.7	1.6	0.95	81.9048	5.91174	0.20412
2.8	2.9	2.4	2.7	2.6	3.1	2.7	2.8		0.4	2.7	2.8	2.05	60.9524	5.27808	-0.39794
3.7	4	4	3.7	3.4	3.7	3.9	3.6		0.1	3.9	3.6	3.05	41.9048	4.79567	-1
4.2	4.2	4.2	4.2	4.2	4.2	4.2	4.2		0.025	4.2	4.2	3.5	33.3333	4.56927	-1.60206
5.9	5.9	5.9	6	6	6	5.9	6		CK	5.9	6	5.25	0	#NUM!	#VALUE!
1.3	1.6	1.6	1.7	1.7	2	1.5	1.8	211	6.4	1.5	1.8	0.95	80.2083	5.84909	0.80618	4.98272	0.766505	0.02254	1.05327			0.951958	0.906224
3	3.2	3.6	3	3	3	3.26667	3		1.6	3.3	3	2.45	48.9583	4.97389	0.20412
4.2	4.2	4.5	4.2	4.2	4.2	4.3	4.2		0.4	4.3	4.2	3.55	26.0417	4.35794	-0.39794
4.7	4.4	4.4	3.9	3.9	4.2	4.5	4		0.1	4.5	4	3.55	26.0417	4.35794	-1
5.2	5.2	5.2	4.7	4.7	4.4	5.2	4.6		0.025	5.2	4.6	4.2	12.5	3.84965	-1.60206
5	5.5	5.7	5.6	5.6	5.6	5.4	5.6		CK	5.4	5.6	4.8	0	#NUM!	#VALUE!
1.8	1.8	1.8	1.7	1.7	1.7	1.8	1.7	212	6.4	1.8	1.7	1.05	76.9231	5.73632	0.80618	4.98557	0.860574	0.0167653	1.03936			0.983476	0.967225
3.3	3.1	2.6	3	3	3.3	3	3.1		1.6	3	3.1	2.35	48.3516	4.95867	0.20412
2.8	3.8	3.3	3.7	3.6	3.2	3.3	3.5		0.4	3.3	3.5	2.7	40.6593	4.76368	-0.39794
4.2	4.2	4.2	4.2	4.2	4.2	4.2	4.2		0.1	4.2	4.2	3.5	23.0769	4.26368	-1
5	4.7	5	5	5	5	4.9	5		0.025	4.9	5	4.25	6.59341	3.49322	-1.60206
5	5.4	5.5	5.2	5.2	5.2	5.3	5.2		CK	5.3	5.2	4.55	0	#NUM!	#VALUE!
0.71	0.71	0.71	0.71	0.71	0.71	0.71	0.71	213	6.4	0.71	0.71	0.01	99.8387	7.94536	0.80618	6.22718	1.51558	-0.809712	0.154984			0.96292	0.927215
1.6	1.6	1.6	1.6	2	2.1	1.6	1.9		1.6	1.6	1.9	1.05	83.0645	5.95672	0.20412
2.6	2.9	2.6	2.7	2.6	3.1	2.7	2.8		0.4	2.7	2.8	2.05	66.9355	5.43813	-0.39794
4.2	4.4	3.7	4.3	4.2	4.4	4.1	4.3		0.1	4.1	4.3	3.5	43.5484	4.83757	-1
5.9	5.9	5.9	5.9	6.5	5.9	5.9	6.1		0.025	5.9	6.1	5.3	14.5161	3.94259	-1.60206
7.1	7.1	6.8	6.8	6.8	6.8	7	6.8		CK	7	6.8	6.2	0	#NUM!	#VALUE!
0.71	0.71	0.71	0.71	0.71	0.71	0.71	0.71	214	6.4	0.71	0.71	0.01	99.8319	7.9326	0.80618	6.02239	1.65828	-0.616537	0.241804			0.954659	0.911373
1.8	1.8	1.8	1.6	1.4	1.5	1.8	1.5		1.6	1.8	1.5	0.95	84.0336	5.99584	0.20412
4	3.9	4.1	4.7	4	3.9	4	4.2		0.4	4	4.2	3.4	42.8571	4.81999	-0.39794
5.3	5.3	5.3	5.3	5.3	5.3	5.3	5.3		0.1	5.3	5.3	4.6	22.6891	4.25087	-1
5.9	6.4	5.7	5.7	5.8	6.2	6	5.9		0.025	6	5.9	5.25	11.7647	3.81317	-1.60206
6.6	6.6	6.6	6.7	6.7	6.7	6.6	6.7		CK	6.6	6.7	5.95	0	#NUM!	#VALUE!
0.71	0.71	0.71	0.71	0.71	0.71	0.71	0.71	215	6.4	0.71	0.71	0.01	99.8148	7.90235	0.80618	6.01051	1.59306	-0.634322	0.232101			0.951434	0.905226
2.3	2.1	1.6	2.2	1.4	1.5	2	1.7		1.6	2	1.7	1.15	78.7037	5.79618	0.20412
3	3.1	3.5	3.5	3.6	3.1	3.2	3.4		0.4	3.2	3.4	2.6	51.8519	5.04644	-0.39794
5	5	5	4.9	4.6	4.6	5	4.7		0.1	5	4.7	4.15	23.1481	4.26602	-1
5.2	5.6	5.7	5	5.6	5.3	5.5	5.3		0.025	5.5	5.3	4.7	12.963	3.87186	-1.60206
6.2	5.9	6.5	6	6	6	6.2	6		CK	6.2	6	5.4	0	#NUM!	#VALUE!
0.71	0.71	0.71	0.71	0.71	0.71	0.71	0.71	216	6.4	0.71	0.71	0.01	99.7778	7.84476	0.80618	6.00541	1.6683	-0.602656	0.249657			0.960828	0.923191
1.3	1.3	1.3	1.3	1.4	1.2	1.3	1.3		1.6	1.3	1.3	0.6	86.6667	6.11077	0.20412
3.5	3.1	3.3	3.6	3.5	3.1	3.3	3.4		0.4	3.3	3.4	2.65	41.1111	4.77531	-0.39794
4.3	4	4.3	4	4.3	4.6	4.2	4.3		0.1	4.2	4.3	3.55	21.1111	4.19743	-1
5	4.7	5	4.4	4.7	4.4	4.9	4.5		0.025	4.9	4.5	4	11.1111	3.77936	-1.60206
5.3	5.3	5.3	5	5.3	5	5.3	5.1		CK	5.3	5.1	4.5	0	#NUM!	#VALUE!
1	1	1	0.71	0.71	0.71	1	0.71	217	6.4	1	0.71	0.155	96.0256	6.75367	0.80618	5.69306	1.00945	-0.68657	0.205793			0.976962	0.954455
1.7	1.7	2.3	1.3	1.4	1.2	1.9	1.3		1.6	1.9	1.3	0.9	76.9231	5.73632	0.20412
2.5	2.9	3	2.5	2.3	2.1	2.8	2.3		0.4	2.8	2.3	1.85	52.5641	5.06432	-0.39794
3.2	3.2	3.2	3.2	3.1	3.3	3.2	3.2		0.1	3.2	3.2	2.5	35.8974	4.6388	-1
3.7	3.7	3.7	3.7	3.7	3.7	3.7	3.7		0.025	3.7	3.7	3	23.0769	4.26368	-1.60206
4.9	4.5	4.7	4.5	4.5	4.5	4.7	4.5		CK	4.7	4.5	3.9	0	#NUM!	#VALUE!
1.6	1.7	2.1	1.3	1.2	1.4	1.8	1.3	218	6.4	1.8	1.3	0.85	83.8095	5.98666	0.80618	5.0759	0.912601	-0.0831695	0.825716			0.977064	0.954654
3.3	3.4	3.8	3	3	3	3.5	3		1.6	3.5	3	2.55	51.4286	5.03582	0.20412
4.3	2.9	3.3	2.7	2.6	3.1	3.5	2.8		0.4	4	4.3	3.45	34.2857	4.59532	-0.39794
4.7	4.1	4.7	4.2	4.9	4.7	4.5	4.6		0.1	4.5	4.6	3.85	26.6667	4.37707	-1
5.3	5.8	6	5.2	5.7	5.3	5.7	5.4		0.025	5.7	5.4	4.85	7.61905	3.56883	-1.60206
6	6	6.3	5.8	5.8	5.8	6.1	5.8		CK	6.1	5.8	5.25	0	#NUM!	#VALUE!
2.4	2.4	2.1	2	2	2	2.3	2	219	6.4	2.3	2	1.45	80.137	5.84652	0.80618	4.96627	0.924844	0.0364754	1.08762			0.992166	0.984394
4.2	4.2	4.2	4.2	4.2	4.2	4.2	4.2		1.6	4.2	4.2	3.5	52.0548	5.05153	0.20412
5.8	5.9	5.4	5.7	6	6	5.7	5.9		0.4	5.7	5.9	5.1	30.137	4.47954	-0.39794
6.7	6.6	7.1	6.9	6.6	6.6	6.8	6.7		0.1	6.8	6.7	6.05	17.1233	4.0507	-1
7.5	7.6	8	7	7.5	7.1	7.7	7.2		0.025	7.7	7.2	6.75	7.53425	3.56288	-1.60206
8	8	8	8	8	8	8	8		CK	8	8	7.3	0	#NUM!	#VALUE!
0.71	0.71	0.71	0.71	0.71	0.71	0.71	0.71	220	6.4	0.71	0.71	0.01	99.8649	7.99967	0.80618	6.13378	1.63567	-0.693157	0.202695			0.959966	0.921535
1.9	1.8	1.4	1.9	2	1.5	1.7	1.8		1.6	1.7	1.8	1.05	85.8108	6.07186	0.20412
4.8	4.4	4.3	4.5	4.6	3.5	4.5	4.2		0.4	4.5	4.2	3.65	50.6757	5.01694	-0.39794
6	6	6	6	6	6	6	6		0.1	6	6	5.3	28.3784	4.42836	-1
7.6	7.1	6.9	7.2	6.9	6.9	7.2	7		0.025	7.2	7	6.4	13.5135	3.89756	-1.60206
8.2	8.2	8.2	8.2	7.7	8.1	8.2	8		CK	8.2	8	7.4	0	#NUM!	#VALUE!
0.71	0.71	0.71	0.71	0.71	0.71	0.71	0.71	221	6.4	0.71	0.71	0.01	99.75	7.80703	0.80618	5.96059	1.56998	-0.611846	0.24443			0.955669	0.913302
1.4	1.8	1.9	1.9	1.4	1.5	1.7	1.6		1.6	1.7	1.6	0.95	76.25	5.71437	0.20412
2.9	2.5	2.4	2.7	2.6	3.1	2.6	2.8		0.4	2.6	2.8	2	50	5	-0.39794
3.7	3.4	3.4	3.9	3.4	3.2	3.5	3.5		0.1	3.6	3.5	2.85	28.75	4.4393	-1
4.2	4.2	4.2	4.3	4.7	4.2	4.2	4.4		0.025	4.2	4.4	3.6	10	3.71845	-1.60206
4.5	4.9	5	4.8	4.2	4.8	4.8	4.6		CK	4.8	4.6	4	0	#NUM!	#VALUE!
0.8	0.8	0.8	0.8	0.8	0.8	0.8	0.8	222	6.4	0.8	0.8	0.1	98.0392	7.06192	0.80618	5.83421	1.3672	-0.610157	0.245382			0.973483	0.947669
1.6	1.6	1.6	1.6	1.6	1.6	1.6	1.6		1.6	1.6	1.6	0.9	82.3529	5.9289	0.20412
2.9	3.6	3.1	2.9	3.3	2.8	3.2	3		0.4	3.2	3	2.4	52.9412	5.07379	-0.39794
3.5	3.7	3.9	3.1	3	2.9	3.7	3		0.1	3.7	3	2.65	48.0392	4.95083	-1
5.2	5.6	5.7	5.6	5.6	5.3	5.5	5.5		0.025	5.5	5.5	4.8	5.88235	3.43527	-1.60206
5.9	5.6	5.6	5.8	5.7	6.2	5.7	5.9		CK	5.7	5.9	5.1	0	#NUM!	#VALUE!
0.71	0.71	0.71	0.71	0.71	0.71	0.71	0.71	223	6.4	0.71	0.71	0.01	99.7895	7.86194	0.80618	6.11826	1.69935	-0.65805	0.219761			0.973259	0.947232
1.3	1	1.3	1.1	1.4	1.4	1.2	1.3		1.6	1.2	1.3	0.55	88.4211	6.1963	0.20412
2.8	2.9	3.3	3.7	3	3.5	3	3.4		0.4	3	3.4	2.5	47.3684	4.93399	-0.39794
3	3.4	3.5	3.8	3.8	3.8	3.3	3.8		0.1	3.3	3.8	2.85	40	4.74665	-1
5.2	5.1	4.7	5.2	5.4	5.3	5	5.3		0.025	5	5.3	4.45	6.31579	3.47121	-1.60206
5.5	5.5	5.5	5.4	5.4	5.4	5.5	5.4		CK	5.5	5.4	4.75	0	#NUM!	#VALUE!
0.72	0.72	0.72	0.72	0.72	0.72	0.72	0.72	224	6.4	0.72	0.72	0.02	99.4937	7.57148	0.80618	5.80485	1.51702	-0.530547	0.294749			0.952807	0.907841
1.4	1.6	1.5	1.6	2	1.5	1.5	1.7		1.6	1.5	1.7	0.9	77.2152	5.74595	0.20412
3.1	3.2	3.3	3.2	2.8	3	3.2	3		0.4	3.2	3	2.4	39.2405	4.72694	-0.39794
3.8	3.8	3.8	3.9	3.9	3.9	3.8	3.9		0.1	3.8	3.9	3.15	20.2532	4.16739	-1
4.2	4.5	4.2	4	4.3	4	4.3	4.1		0.025	4.3	4.1	3.5	11.3924	3.79408	-1.60206
4.9	4.6	4.9	4.5	4.5	4.5	4.8	4.5		CK	4.8	4.5	3.95	0	#NUM!	#VALUE!
0.8	0.8	0.8	0.8	0.8	0.8	0.8	0.8	225	6.4	0.8	0.8	0.1	98.1651	7.08912	0.80618	5.78778	1.23597	-0.637375	0.230475			0.978095	0.95667
2	1.9	1.5	2.3	2	2	1.8	2.1		1.6	1.8	2.1	1.25	77.0642	5.74096	0.20412
2.8	2.9	3.3	3.6	3.5	3.4	3	3.5		0.4	3	3.5	2.55	53.211	5.08058	-0.39794
4.5	4.4	4	4	4	4	4.3	4		0.1	4.3	4	3.45	36.6972	4.66012	-1
5.5	5.5	5.5	5.4	5.6	4.9	5.5	5.3		0.025	5.5	5.3	4.7	13.7615	3.9089	-1.60206
6	5.9	6.1	6.3	6.3	6.3	6	6.3		CK	6	6.3	5.45	0	#NUM!	#VALUE!
0.9	0.9	0.9	0.8	0.8	0.8	0.9	0.8	226	6.4	0.9	0.8	0.15	97.6378	6.98411	0.80618	5.55856	1.34691	-0.414697	0.38486			0.974899	0.950429
1.9	2.2	1.9	2.6	2.8	3	2	2.8		1.6	2	2.8	1.7	73.2283	5.61973	0.20412
4.4	4.7	4.7	4.8	4.8	4.8	4.6	4.8		0.4	4.6	4.8	4	37.0079	4.66836	-0.39794
5.7	5.7	5.7	5.7	5.7	5.7	5.7	5.7		0.1	5.7	5.7	5	21.2598	4.20256	-1
6.4	6.5	6.9	6.4	6.4	6.4	6.6	6.4		0.025	6.6	6.4	5.8	8.66142	3.6381	-1.60206
7	7	7	7.1	7.1	7.1	7	7.1		CK	7	7.1	6.35	0	#NUM!	#VALUE!
1.5	1.5	1.5	1.5	1.5	1.5	1.5	1.5	227	6.4	1.5	1.5	0.8	86.4407	6.10033	0.80618	5.37057	0.838068	-0.442177	0.361263			0.978515	0.957493
2.5	2.3	2.4	1.8	1.9	2.3	2.4	2		1.6	2.4	2	1.5	74.5763	5.66121	0.20412
4	4.3	4.3	3.9	4.2	3.9	4.2	4		0.4	4.2	4	3.4	42.3729	4.80764	-0.39794
5	5	5	4.9	4.9	4.9	5	4.9		0.1	5	4.9	4.25	27.9661	4.41615	-1
5.2	5.2	4.9	5.2	5.7	5.9	5.1	5.6		0.025	5.1	5.6	4.65	21.1864	4.20003	-1.60206
6.7	6.6	7.1	6.2	6.5	6.5	6.8	6.4		CK	6.8	6.4	5.9	0	#NUM!	#VALUE!
0.8	0.8	0.8	0.8	0.8	0.8	0.8	0.8	228	6.4	0.8	0.8	0.1	97.4359	6.94911	0.80618	5.59875	1.17784	-0.508347	0.310208			0.957721	0.917229
1.8	1.8	1.5	2.1	2.2	1.7	1.7	2		1.6	1.7	2	1.15	70.5128	5.53921	0.20412
2.7	2.6	3.1	3.4	3	3.5	2.8	3.3		0.4	2.8	3.3	2.35	39.7436	4.74001	-0.39794
3.7	3.9	3.8	3.1	3.2	2.7	3.8	3		0.1	3.8	3	2.7	30.7692	4.4976	-1
4	4	4.3	4	4	4	4.1	4		0.025	4.1	4	3.35	14.1026	3.92428	-1.60206
4.6	4.8	4.7	4.5	4.5	4.5	4.7	4.5		CK	4.7	4.5	3.9	0	#NUM!	#VALUE!
0.8	0.8	0.8	0.8	0.8	0.8	0.8	0.8	229	6.4	0.8	0.8	0.1	97.9381	7.04114	0.80618	5.73724	1.2937	-0.569873	0.269232			0.952447	0.907154
1.4	1.5	1.3	1.3	1.3	1.3	1.4	1.3		1.6	1.4	1.3	0.65	86.5979	6.10758	0.20412
3.9	3.9	3.9	3.9	3.9	3.9	3.9	3.9		0.4	3.9	3.9	3.2	34.0206	4.5881	-0.39794
4.3	4.3	4.3	4.3	4.3	4.3	4.3	4.3		0.1	4.3	4.3	3.6	25.7732	4.34965	-1
4.6	4.7	5.1	5	4.6	4.5	4.8	4.7		0.025	4.8	4.7	4.05	16.4948	4.02568	-1.60206
5.9	5.4	5.8	5.6	5.3	5.3	5.7	5.4		CK	5.7	5.4	4.85	0	#NUM!	#VALUE!
1	1.1	1.2	0.9	0.9	0.9	1.1	0.9	231	6.4	1.1	0.9	0.3	91.5493	6.37538	0.80618	5.28693	0.948942	-0.302364	0.498467			0.95641	0.914719
2.2	1.7	2.1	2	2.3	2.3	2	2.2		1.6	2	2.2	1.4	60.5634	5.26796	0.20412
2.8	2.9	3.3	2.8	3.1	3.4	3	3.1		0.4	3	3.1	2.35	33.8028	4.58215	-0.39794
3.4	3.8	3	3.4	3.5	3	3.4	3.3		0.1	3.4	3.3	2.65	25.3521	4.33655	-1
3.7	3.6	4.1	3.2	3.8	3.8	3.8	3.6		0.025	3.8	3.6	3	15.493	3.98448	-1.60206
4.3	4.3	4.3	4.2	4.2	4.2	4.3	4.2		CK	4.3	4.2	3.55	0	#NUM!	#VALUE!
1	1	1	0.71	0.71	0.71	1	0.71	232	6.4	1	0.71	0.155	97.2807	6.92375	0.80618	5.63834	1.32428	-0.482026	0.32959			0.975519	0.951638
1.6	1.6	1.3	1.8	2.1	1.8	1.5	1.9		1.6	1.5	1.9	1	82.4561	5.93289	0.20412
4.3	4.2	4.1	4.5	4.5	4.5	4.2	4.5		0.4	4.2	4.5	3.65	35.9649	4.6406	-0.39794
5	5	5	5	5	5	5	5		0.1	5	5	4.3	24.5614	4.31164	-1
5.7	5.8	5.3	5.7	6.1	6.2	5.6	6		0.025	5.6	6	5.1	10.5263	3.74788	-1.60206
6.5	6.5	6.5	6.4	6.3	6.2	6.5	6.3		CK	6.5	6.3	5.7	0	#NUM!	#VALUE!
0.71	0.71	0.71	0.8	0.8	0.8	0.71	0.8	233	6.4	0.71	0.8	0.055	99.0984	7.36494	0.80618	5.77743	1.41972	-0.547597	0.283402			0.954295	0.910679
2.3	2.1	1.6	1.5	1.8	1.8	2	1.7		1.6	2	1.7	1.15	81.1475	5.88335	0.20412
4.5	4.7	4.6	4.5	4.5	4.5	4.6	4.5		0.4	4.6	4.5	3.85	36.8852	4.66511	-0.39794
5.5	5.5	5.5	5.5	5.5	5.2	5.5	5.4		0.1	5.5	5.4	4.75	22.1311	4.23223	-1
6	6.1	6.5	5.6	5.5	6	6.2	5.7		0.025	6.2	5.7	5.25	13.9344	3.91673	-1.60206
6.8	7.1	6.8	7	6.7	6.4	6.9	6.7		CK	6.9	6.7	6.1	0	#NUM!	#VALUE!
0.71	0.71	0.71	0.71	0.71	0.71	0.71	0.71	234	6.4	0.71	0.71	0.01	99.8198	7.91093	0.80618	6.23922	1.42614	-0.868936	0.135227			0.956197	0.914313
1.6	1.6	1.6	1.3	1.4	1.5	1.6	1.4		1.6	1.6	1.4	0.8	85.5856	6.06188	0.20412
2.8	2.9	2.4	2.7	2.6	3.1	2.7	2.8		0.4	2.7	2.8	2.05	63.0631	5.33352	-0.39794
4.1	4.1	3.8	3.9	3.9	3.6	4	3.8		0.1	4	3.8	3.2	42.3423	4.80686	-1
4.7	4.7	5	5.2	5.2	5.2	4.8	5.2		0.025	4.8	5.2	4.3	22.5225	4.24534	-1.60206
5.9	5.9	5.9	6.9	6.4	6.5	5.9	6.6		CK	5.9	6.6	5.55	0	#NUM!	#VALUE!
0.71	0.71	0.71	0.71	0.71	0.71	0.71	0.71	235	6.4	0.71	0.71	0.01	99.8601	7.98919	0.80618	6.13087	1.70367	-0.663781	0.21688			0.968416	0.937829
2	2.1	2.5	1.7	1.6	2.1	2.2	1.8		1.6	2.2	1.8	1.3	81.8182	5.90846	0.20412
3	3.1	3.5	2.8	2.8	3.1	3.2	2.9		0.4	3.2	2.9	2.35	67.1329	5.44358	-0.39794
6.1	6.2	5.7	6.4	6.5	6.9	6	6.6		0.1	6	6.6	5.6	21.6783	4.2169	-1
7	7	7	7.2	7.2	7.5	7	7.3		0.025	7	7.3	6.45	9.79021	3.7064	-1.60206
8	8	8.3	7.8	7.5	7.5	8.1	7.6		CK	8.1	7.6	7.15	0	#NUM!	#VALUE!
				.
0.71	0.71	0.71	0.71	0.71	0.71	0.71	0.71	237	6.4	0.71	0.71	0.01	99.8319	7.9326	0.80618	6.14135	1.54415	-0.739145	0.182329			0.954822	0.911686
1.7	1.7	1.4	1.7	1.7	1.7	1.6	1.7		1.6	1.6	1.7	0.95	84.0336	5.99584	0.20412
2.9	3.3	2.8	3.1	3.5	3	3	3.2		0.4	3	3.2	2.4	59.6639	5.24466	-0.39794
5	5.3	5.3	5	5	5	5.2	5		0.1	5.2	5	4.4	26.0504	4.35821	-1
5.2	5.5	6.1	5.6	5.2	5.7	5.6	5.5		0.025	5.6	5.5	4.85	18.4874	4.10305	-1.60206
6.6	6.6	6.6	6.6	6.9	6.6	6.6	6.7		CK	6.6	6.7	5.95	0	#NUM!	#VALUE!

## Sheet: compile ac appendix
				编号	EC50				r	r^2
1	CZWBH1-(1)		CZ	1	0.147565	0.641588	y=6.2543-1.5093x		0.959167	0.920001		0.641588
2	CZWBH1-(2)		CZ	2	0.226119	0.983125	y=6.0127-1.5684x		0.956083	0.914095		0.983125
3	XTNJ2		XT	3	0.781019	3.39573	y=5.1090-1.0517x		0.97072	0.942297		3.39573
4	SJZGC1-1-(1)		SJZ	4	0.189775	0.825109	y=6.1666-1.6163x		0.963468	0.92827		0.825109
5	SJZGC1-2-(1)		SJZ	5	0.204391	0.888656	y=6.0472-1.5187x		0.958352	0.918439		0.888656
6	SJZGC2-1-(1)		SJZ	6	0.89129	3.87517	y=5.0707-1.4152x		0.983755	0.967775		3.87517
7	SJZGC3-1-(1)		SJZ	7	0.636124	2.76576	y=5.2035-1.0360x		0.96141	0.92431		2.76576
8	SJZGC3-2-(1)		SJZ	8	0.980439	4.26278	y=5.0083-0.9656x		0.956394	0.91469		4.26278
9	SJZALY3-(1)杆		SJZ	9	1.44236	6.27115	y=4.8722+0.8035x		0.963526	0.928382		6.27115
11	SJZALY2-(1)		SJZ	11	0.741144	3.22237	y=5.1765-1.3566x		0.972119	0.945016		3.22237
13	TSFR2		TS	13	0.0417114	0.181354	y=5.9496-0.6883x		0.974222	0.949109		0.181354
14	HDGJC1-(1)		HD	14	0.502043	2.1828	y=5.2399-0.8016x		0.975182	0.95098		2.1828
15	HDGJC1-(2)		HD	15	0.53802	2.33922	y=5.2265-0.8415x		0.979486	0.959393		2.33922
16	HSJX2-1-(1)		HS	16	0.0990078	0.430469	y=6.3532-1.3473x		0.952649	0.907541		0.430469
17	HSJX2-2-(1)		HS	17	0.119565	0.519848	y=6.3208-1.4320x		0.954307	0.910701		0.519848
18	HSJX2-2-(2)		HS	18	0.139892	0.608227	y=6.2974-1.5188x		0.95564	0.913248		0.608227
25	CM-BT4茎(1)		CZ	25	0.283154	1.2311	y=5.8270-1.5093x		0.977047	0.95462		1.2311
26	CM-BT4茎(2)		CZ	26	0.174915	0.760501	y=6.1837-1.5633x		0.956975	0.915801		0.760501
27	CM-BT4茎(3）		CZ	27	0.7555	3.28478	y=5.1832-1.5045x		0.964486	0.930233		3.28478
28	CM-BT2-（1）		CZ	29	0.856366	3.72333	y=5.0466-0.6914x		0.985576	0.971361		3.72333
29	CM-BT4杆（2）		HD	31	0.549663	2.38984	y=5.2220-0.8543x		0.992732	0.985517		2.38984
31	HDYN1		HD	32	0.278779	1.21208	y=5.7602-1.3704x		0.981278	0.962907		1.21208
32	HDYN2		BD	33	0.334396	1.4539	y=5.2956-0.6214x		0.967794	0.936625		1.4539
34	BDAX2		BD	34	0.324801	1.41218	y=5.4324-0.8853x		0.999641	0.999281		1.41218
35	BDAX3		BD	35	0.138837	0.603637	y=6.0461-1.2199x		0.965927	0.933016		0.603637
36	BDAX4		BD	36	0.232022	1.00879	y=5.8067-1.2714x		0.968584	0.938156		1.00879
37	BDAX5		BD	37	0.279228	1.21404	y=5.4756-0.8584x		0.971306	0.943436		1.21404
38	BDAX6		BD	38	0.29662	1.28965	y=5.4686-0.8879x		0.972146	0.945068		1.28965
40	SJZXJ2-2-(1)		SJZ	39	0.0682438	0.296712	y=6.6487-1.4140x		0.968444	0.937885		0.296712
41	SJZXJ2-2-(2）		SJZ	40	0.344949	1.49978	y=5.6673-1.4437x		0.97014	0.941171		1.49978
43	SJZXJ3-2-(1)		SJZ	41	0.689271	2.99683	y=5.1611-0.9969x		0.981483	0.963309		2.99683
44	SJZXJ3-2-(2)		SJZ	42	0.911476	3.96294	y=5.0290-0.7222x		0.981457	0.963257		3.96294
52	LFWA3-(1)		XT	54	0.766013	3.33049	y=5.1125-0.9722x		0.978388	0.957242		3.33049
54	NJBM1		XT	55	0.112965	0.491151	y=5.5945-0.6277x		0.972071	0.944923		0.491151
55	NJBM2-(1)		XT	56	0.749278	3.25773	y=5.0796-0.6351x		0.963566	0.92846		3.25773
56	NJBM3-(1)		SJZ	58	0.757633	3.29406	y=5.1216-1.0086x		0.970709	0.942277		3.29406
58	GY6		SJZ	59	0.243378	1.05817	y=5.9618-1.5672x		0.952542	0.907337		1.05817
59	GY10节		SJZ	60	3.46092	15.0475	y=4.5682+0.8007x		0.977612	0.955726		15.0475
60	GY10杆		SJZ	61	0.87148	3.78904	y=5.0581-0,9727x		0.950281	0.903033		3.78904
61	GY11节		SJZ	62	0.539395	2.3452	y=5.4268-1.5918x		0.960399	0.922365		2.3452
62	GY11杆		SJZ	63	0.170239	0.740169	y=5.6307-0,8202x		0.962951	0.927275		0.740169
63	TSHG1		TS	64	0.128567	0.558986	y=6.0721-1.2035x		0.956127	0.91418		0.558986
64	TSHG2-1		TS	65	0.261215	1.13572	y=5.8515-1.4605x		0.955111	0.912238		1.13572
65	TSHG2-2		TS	66	0.685388	2.97995	y=5.1339-0.8614x		0.974386	0.949428		2.97995
66	TSHG3		TS	67	0.372865	1.62115	y=5.1399-0.7466x		0.984465	0.969172		1.62115
67	TSHG4-1		TS	69	0.21629	0.94039	y=6.0003-1.5043x		0.950561	0.903567		0.94039
69	TSHG5-1		TS	70	1.5072	6.55306	y=4.8838+0.6524x		0.984668	0.96957		6.55306
70	TSHG5-2		HD	71	0.234078	1.01773	y=6.1021-1.7477x		0.983257	0.966794		1.01773
71	CXLQC2		HD	75	0.390719	1.69878	y=5.4277-1.0479x		0.99627	0.992553		1.69878
73	DMCX1		HD	76	0.247429	1.07578	y=5.9794-1.6147x		0.954984	0.911995		1.07578
74	DMCX2		HD	77	0.287172	1.24857	y=5.2674-0.4931x		0.973589	0.947875		1.24857
75	DMCX3		SJZ	202	0.204966	0.891157	y=6.1605-1.6860x		0.960723	0.922989		0.891157
76	CXNWG1		SJZ	203	0.606358	2.63634	y=5.2580-1.1877x		0.958758	0.919216		2.63634
77	CXDZY3		SJZ	204	0.531746	2.31194	y=5.2009-0.7324x		0.964602	0.930457		2.31194
202	SJZXJ1-2(2)		SJZ	205	0.804753	3.49892	y=5.1009-1.0693x		0.962514	0.926434		3.49892
203	SJZXJ2-2(2)		SJZ	206	0.380776	1.65555	y=5.7283-1.7368x		0.957374	0.916564		1.65555
204	SJZXJ3-1(2)		SJZ	207	0.346782	1.50775	y=5.3842-0.8353x		0.993177	0.986401		1.50775
205	SJZXJ4-2(1)		SJZ	208	0.166626	0.724459	y=5.5702-0.7327x		0.963969	0.929235		0.724459
206	SJZXJ1-2(3)		SJZ	209	0.123135	0.535371	y=5.8736-0.9604x		0.970839	0.942528		0.535371
207	SJZXJ2-1(1）		SJZ	211	1.05327	4.57944	y=4.9827+0.7665x		0.951958	0.906224		4.57944
208	SJZXJ2-1(2）		SJZ	212	1.03936	4.51895	y=4.9856+0.8606x		0.983476	0.967225		4.51895
209	SJZXJ3-1(2)		SJZ	213	0.154984	0.673845	y=6.2272-1.5156x		0.96292	0.927215		0.673845
210	SJZXJ3-1(3)		SJZ	214	0.241804	1.05132	y=6.0224-1.6583x		0.954659	0.911373		1.05132
201	SJZGC1-1(3)		SJZ	215	0.232101	1.00914	y=6.0105-1.5931x		0.951434	0.905226		1.00914
211	SJZGC3-1(2)		SJZ	216	0.249657	1.08547	y=6.0054-1.6683x		0.960828	0.923191		1.08547
212	SJZGC1-1(2)		SJZ	217	0.205793	0.894752	y=5.6931-1.0094x		0.976962	0.954455		0.894752
213	SJZGC2-1(3)		CZ	218	0.825716	3.59007	y=5.0759-0.9126x		0.977064	0.954654		3.59007
214	SJZGC1-2(2)		CZ	219	1.08762	4.72876	y=4.9663+0.9248x		0.992166	0.984394		4.72876
215	SJZGC2-2(2)		XT	220	0.202695	0.881282	y=6.1378-1.6357x		0.959966	0.921535		0.881282
216	SJZGC2-2(1)		XT	221	0.24443	1.06274	y=5.9606-1.5700x		0.955669	0.913302		1.06274
217	SJZGC2-1(2)		XT	222	0.245382	1.06688	y=5.8342-1.3672x		0.973483	0.947669		1.06688
218	CM-BT(5)		LF	223	0.219761	0.955481	y=6.1183-1.6994x		0.973259	0.947232		0.955481
219	CM-BT(4)		LF	224	0.294749	1.28152	y=5.8049-1.5170x		0.952807	0.907841		1.28152
220	NJBM2-(2)		LF	225	0.230475	1.00207	y=5.7878-1.2360x		0.978095	0.95667		1.00207
222	NJBM3-(2)		LF	226	0.38486	1.67348	y=5.5586-1.3469x		0.974899	0.950429		1.6733
223	LFGA3-1(1)		LF	227	0.361263	1.57071	y=5.3706-0.8381x		0.978515	0.957493		1.57071
224	LFGA1-3		LF	228	0.310208	1.34873	y=5.5987-1.1778x		0.957721	0.917229		1.34873
225	LFGA3-2		LF	229	0.269232	1.17058	y=5.7372-1.2937x		0.952447	0.907154		1.17058
226	LFGA3-1(3)		HS	231	0.498467	2.16725	y=5.2869-0.9489x		0.95641	0.914719		2.16725
227	LFGA3-1(2)		HS	232	0.32959	1.433	y=5.6383-1.3243x		0.975519	0.951638		1.433
228	LFGA3-3(2)		HS	233	0.283402	1.23218	y=5.7774-1.4197x		0.954295	0.910679		1.23218
229	LFGA3-3(1)		HS	234	0.135227	0.587944	y=6.2392-1.4261x		0.956197	0.914313		0.587944
231	HSJX2-1(3)		CZ	235	0.21688	0.942956	y=6.1309-1.7037x		0.968416	0.937829		0.942956
232	HSJX1-2		CZ	237	0.182329	0.792734	y=6.1414-1.5442x		0.954822	0.911686		0.792734
233	HSJX2-3
234	HSJX2-4
235	CZWBH2-(2)
237	CZWBH2-(3)

## Sheet: compile on 22-1-20
			编号	a	b	x	EC50			r	r^2
1	CZWBH1-(1)	CZ	1	6.25426	1.50931	-0.831016	0.147565			0.959167	0.920001		y=6.2542-1.5093x
2	CZWBH1-(2)	CZ	2	6.0127	1.56846	-0.645663	0.226119			0.956083	0.914095		y=6.0127-1.5684x
3	XTNJ2	XT	3	5.10902	1.0157	-0.107339	0.781019			0.97072	0.942297		y=5.1090-1.0517x
4	SJZGC1-1-(1)	SJZ	4	6.16655	1.61626	-0.721761	0.189775			0.963468	0.92827		y=6.1665-1.6162x
5	SJZGC1-2-(1)	SJZ	5	6.0472	1.5187	-0.689538	0.204391			0.958352	0.918439		y=6.0472-1.5187x
6	SJZGC2-1-(1)	SJZ	6	5.07073	1.41517	-0.049981	0.89129			0.983755	0.967775		y=5.0707-1.4152x
7	SJZGC3-1-(1)	SJZ	7	5.20354	1.03603	-0.196458	0.636124			0.96141	0.92431		y=5.2035-1.0360x
8	SJZGC3-2-(1)	SJZ	8	5.00828	0.96556	-0.00857941	0.980439			0.956394	0.91469		y=5.0083-0.9656x
9	SJZALY3-(1)杆	SJZ	9	4.87218	0.803498	0.159075	1.44236			0.963526	0.928382		y=4.8722+0.8035x
11	SJZALY2-(1)	SJZ	11	5.17649	1.35657	-0.130097	0.741144			0.972119	0.945016		y=5.1765-1.3566x
13	TSFR2	TS	13	5.94963	0.688261	-1.37975	0.0417114			0.974222	0.949109		y=5.9496-0.6883x
14	HDGJC1-(1)	HD	14	5.2399	0.801634	-0.299259	0.502043			0.975182	0.95098		y=5.2399-0.8016x
15	HDGJC1-(2)	HD	15	5.22654	0.841539	-0.269201	0.53802			0.979486	0.959393		y=5.2266-0.8415x
16	HSJX2-1-(1)	HS	16	6.35315	1.34732	-1.00433	0.0990078			0.952649	0.907541		y=6.3532-1.3473x
17	HSJX2-2-(1)	HS	17	6.32084	1.43197	-0.922396	0.119565			0.954307	0.910701		y=6.3208-1.4320x
18	HSJX2-2-(2)	HS	18	6.29739	1.51882	-0.854206	0.139892			0.95564	0.913248		y=6.2974-1.5188x
25	CM-BT4茎(1)	CZ	25	5.82705	1.50928	-0.547978	0.283154			0.977047	0.95462		y=5.8271-1.5093x
26	CM-BT4茎(2)	CZ	26	6.18369	1.56331	-0.757172	0.174915			0.956975	0.915801		y=6.1837-1.5633x
27	CM-BT4茎(3）	CZ	27	5.18319	1.50449	-0.121766	0.7555			0.964486	0.930233		y=5.1832-1.5049x
28	CM-BT2-（1）	CZ	29	5.04656	0.691352	-0.0673408	0.856366			0.985576	0.971361		y=5.0465-0.6914x
29	CM-BT4杆（2）	HD	31	5.22204	0.854324	-0.259904	0.549663			0.992732	0.985517		y=5.2220-0.8543x
31	HDYN1	HD	32	5.76024	1.37044	-0.55474	0.278779			0.981278	0.962907		y=5.7602-1.3704x
32	HDYN2	BD	33	5.29561	0.621365	-0.475739	0.334396			0.967794	0.936625		y=5.2956-0.6214x
34	BDAX2	BD	34	5.43238	0.88533	-0.488382	0.324801			0.999641	0.999281		y=5.4324-0.8853x
35	BDAX3	BD	35	6.04605	1.21989	-0.857496	0.138837			0.965927	0.933016		y=6.0460-1.2199x
36	BDAX4	BD	36	5.80669	1.27144	-0.634471	0.232022			0.968584	0.938156		y=5.8067-1.2714x
37	BDAX5	BD	37	5.4756	0.858419	-0.55404	0.279228			0.971306	0.943436		y=5.4756-0.8584x
38	BDAX6	BD	38	5.46862	0.887873	-0.527799	0.29662			0.972146	0.945068		y=5.4686-0.8879x
40	SJZXJ2-2-(1)	SJZ	39	6.64868	1.41404	-1.16594	0.0682438			0.968444	0.937885		y=6.6487-1.4140x
41	SJZXJ2-2-(2）	SJZ	40	5.66734	1.44368	-0.462245	0.344949			0.97014	0.941171		y=5.6673-1.4437x
43	SJZXJ3-2-(1)	SJZ	41	5.16111	0.996935	-0.16161	0.689271			0.981483	0.963309		y=5.1611-0.9969x
44	SJZXJ3-2-(2)	SJZ	42	5.02907	0.722244	-0.0402547	0.911476			0.981457	0.963257		y=5.0290-0.7222x
52	LFWA3-(1)	XT	54	5.11255	0.972217	-0.115764	0.766013			0.978388	0.957242		y=5.1125-0.9722x
54	NJBM1	XT	55	5.59445	0.627683	-0.947057	0.112965			0.972071	0.944923		y=5.5944-0.6277x
55	NJBM2-(1)	XT	56	5.07961	0.635063	-0.125357	0.749278			0.963566	0.92846		y=5.0796-0.6350x
56	NJBM3-(1)	SJZ	58	5.12158	1.00862	-0.120541	0.757633			0.970709	0.942277		y=5.1216-1.0086x
58	GY6	SJZ	59	5.96182	1.5672	-0.613718	0.243378			0.952542	0.907337		y=5.9618-1.5672x
59	GY10节	SJZ	60	4.56827	0.800696	0.539191	3.46092			0.977612	0.955726		y=4.5682+0.8007x
60	GY10杆	SJZ	61	5.05811	0.972739	-0.0597425	0.87148			0.950281	0.903033		y=5.0581-0,9727x
61	GY11节	SJZ	62	5.42676	1.59182	-0.268093	0.539395			0.960399	0.922365		y=5.4268-1.5918x
62	GY11杆	SJZ	63	5.63067	0.820176	-0.768941	0.170239			0.962951	0.927275		y=5.6307-0,8202x
63	TSHG1	TS	64	6.07212	1.20346	-0.890871	0.128567			0.956127	0.91418		y=6.0721-1.2035x
64	TSHG2-1	TS	65	5.8515	1.46054	-0.583001	0.261215			0.955111	0.912238		y=5.8515-1.4605x
65	TSHG2-2	TS	66	5.13393	0.816353	-0.164063	0.685388			0.974386	0.949428		y=5.1339-0.8613x
66	TSHG3	TS	67	5.31986	0.746566	-0.428448	0.372865			0.984465	0.969172		y=5.1399-0.7466x
67	TSHG4-1	TS	69	6.00031	1.5043	-0.664964	0.21629			0.950561	0.903567		y=6.0003-1.5043x
69	TSHG5-1	TS	70	4.88376	0.652386	0.178172	1.5072			0.984668	0.96957		y=4.8838+0.6524x
70	TSHG5-2	HD	71	6.10219	1.74773	-0.63064	0.234078			0.983257	0.966794		y=6.1021-1.7477x
71	CXLQC2	HD	75	5.4277	1.04793	-0.408135	0.390719			0.99627	0.992553		y=5.4277-1.0479x
73	DMCX1	HD	76	5.97941	1.61472	-0.60655	0.247429			0.954984	0.911995		y=5.9794-1.6147x
74	DMCX2	HD	77	5.26718	0.493077	-0.541858	0.287172			0.973589	0.947875		y=5.2674-0.4931x
75	DMCX3	SJZ	202	6.1605	1.68599	-0.688318	0.204966			0.960723	0.922989		y=6.1605-1.6860x
76	CXNWG1	SJZ	203	5.25805	1.18768	-0.217271	0.606358			0.958758	0.919216		y=5.2580-1.1877x
77	CXDZY3	SJZ	204	5.2009	0.732415	-0.274296	0.531746			0.964602	0.930457		y=5.2009-0.7324x
202	SJZXJ1-2(2)	SJZ	205	5.10087	1.06927	-0.0943376	0.804753			0.962514	0.926434		y=5.1009-1.0693x
203	SJZXJ2-2(2)	SJZ	206	5.7283	1.73682	-0.419331	0.380776			0.957374	0.916564		y=5.7283-1.7368x
204	SJZXJ3-1(2)	SJZ	207	5.38419	0.835306	-0.459944	0.346782			0.993177	0.986401		y=5.3842-0.8353x
205	SJZXJ4-2(1)	SJZ	208	5.57024	0.732711	-0.778258	0.166626			0.963969	0.929235		y=5.5703-0.7327x
206	SJZXJ1-2(3)	SJZ	209	5.87356	0.960363	-0.909617	0.123135			0.970839	0.942528		y=5.8736-0.9604x
207	SJZXJ2-1(1）	SJZ	211	4.98272	0.766505	0.02254	1.05327			0.951958	0.906224		y=4.9827+0.7665x
208	SJZXJ2-1(2）	SJZ	212	4.98557	0.860574	0.0167653	1.03936			0.983476	0.967225		y=4.9856+0.8606x
209	SJZXJ3-1(2)	SJZ	213	6.22718	1.51558	-0.809712	0.154984			0.96292	0.927215		y=6.2272-1.5156x
210	SJZXJ3-1(3)	SJZ	214	6.02239	1.65828	-0.616537	0.241804			0.954659	0.911373		y=6.0224-1.6583x
201	SJZGC1-1(3)	SJZ	215	6.01051	1.59306	-0.634322	0.232101			0.951434	0.905226		y=6.0105-1.5931x
211	SJZGC3-1(2)	SJZ	216	6.00541	1.6683	-0.602656	0.249657			0.960828	0.923191		y=6.0054-1.6683x
212	SJZGC1-1(2)	SJZ	217	5.69306	1.00945	-0.68657	0.205793			0.976962	0.954455		y=5.6931-1.0094x
213	SJZGC2-1(3)	CZ	218	5.0759	0.912601	-0.0831695	0.825716			0.977064	0.954654		y=5.0759-0.9126x
214	SJZGC1-2(2)	CZ	219	4.96627	0.924844	0.0364754	1.08762			0.992166	0.984394		y=4.9662+0.9248x
215	SJZGC2-2(2)	XT	220	6.13378	1.63567	-0.693157	0.202695			0.959966	0.921535		y=6.1378-1.6357x
216	SJZGC2-2(1)	XT	221	5.96059	1.56998	-0.611846	0.24443			0.955669	0.913302		y=5.9606-1.5699x
217	SJZGC2-1(2)	XT	222	5.83421	1.3672	-0.610157	0.245382			0.973483	0.947669		y=5.8342-1.3672x
218	CM-BT(5)	LF	223	6.11826	1.69935	-0.65805	0.219761			0.973259	0.947232		y=6.1182-1.6993x
219	CM-BT(4)	LF	224	5.80485	1.51702	-0.530547	0.294749			0.952807	0.907841		y=5.8049-1.5170x
220	NJBM2-(2)	LF	225	5.78778	1.23597	-0.637375	0.230475			0.978095	0.95667		y=5.7878-1.2360x
221	NJBM3-(3)	LF	226	5.55856	1.34691	-0.414697	0.38486			0.974899	0.950429		y=5.5586-1.3469x
222	NJBM3-(2)	LF	227	5.37057	0.838068	-0.442177	0.361263			0.978515	0.957493		y=5.3706-0.8381x
223	LFGA3-1(1)	LF	228	5.59875	1.17784	-0.508347	0.310208			0.957721	0.917229		y=5.5987-1.1778x
224	LFGA1-3	LF	229	5.73724	1.2937	-0.569873	0.269232			0.952447	0.907154		y=5.7372-1.2937x
225	LFGA3-2	HS	231	5.28693	0.948942	-0.302364	0.498467			0.95641	0.914719		y=5.2869-0.9489x
226	LFGA3-1(3)	HS	232	5.63834	1.32428	-0.482026	0.32959			0.975519	0.951638		y=5.6383-1.3242x
227	LFGA3-1(2)	HS	233	5.77743	1.41972	-0.547597	0.283402			0.954295	0.910679		y=5.7774-1.4197x
228	LFGA3-3(2)	HS	234	6.23922	1.42614	-0.868936	0.135227			0.956197	0.914313		y=6.2392-1.4261x
229	LFGA3-3(1)	CZ	235	6.13087	1.70367	-0.663781	0.21688			0.968416	0.937829		y=6.1309-1.7036x
231	HSJX2-1(3)	CZ	237	6.14135	1.54415	-0.739145	0.182329			0.954822	0.911686		y=6.1414-1.5442x
232	HSJX1-2
233	HSJX2-3
234	HSJX2-4
235	CZWBH2-(2)
237	CZWBH2-(3)

## Sheet: ec50 list
	EC50		resistance index
13	0.0417114		0.179173
39	0.0682438		0.293144		<0.2	0.2-0.4	0.4-0.6	0.6-0.8	0.8-1.0	1.0-1.2	1.2-1.4	1.4-1.6	>1.6
16	0.0990078		0.425291		20.7317	46.3415	7.31707	12.1951	8.53659	3.65854	0	2.43902	1	102.22
55	0.112965		0.485244
17	0.119565		0.513595		17	38	6	10	7	3	0	2
209	0.123135		0.528932
64	0.128567		0.552263
234	0.135227		0.580873
35	0.138837		0.596377
18	0.139892		0.600912
1	0.147565		0.633871
213	0.154984		0.66574
208	0.166626		0.715746
63	0.170239		0.731267
26	0.174915		0.751354
237	0.182329		0.783199
4	0.189775		0.815185
220	0.202695		0.870683
5	0.204391		0.877968
202	0.204966		0.880439
217	0.205793		0.88399
69	0.21629		0.92908	<0.05	0.05-0.1	0.10-0.15	0.15-0.20	0.20-0.25	0.25-0.30	0.30-0.35	0.35-0.40
235	0.21688		0.931614	1	2	7	8	17	9	6	5	55
223	0.219761		0.943989									82	0.670732
2	0.226119		0.971301
225	0.230475		0.990015	<0.05	0.05-0.1	0.10-0.15	0.15-0.20	0.20-0.25	0.25-0.30	0.30-0.35	0.35-0.40
36	0.232022		0.996659	1.85185	3.7037	12.963	14.8148	31.4815	16.6667	11.1111	9.25926
215	0.232101		0.996999
71	0.234078		1.00549
214	0.241804		1.03868
59	0.243378		1.04544
221	0.24443		1.04996
222	0.245382		1.05405
76	0.247429		1.06284
216	0.249657		1.07241
65	0.261215		1.12206
229	0.269232		1.1565
32	0.278779		1.1975
37	0.279228		1.19943
25	0.283154		1.2163
233	0.283402		1.21736
77	0.287172		1.23356
224	0.294749		1.2661
38	0.29662		1.27414
228	0.310208		1.33251
34	0.324801		1.39519
232	0.32959		1.41577
33	0.334396		1.43641
40	0.344949		1.48174
207	0.346782		1.48961
227	0.361263		1.55182
67	0.372865		1.60165
206	0.380776		1.63563
226	0.38486		1.65318
75	0.390719	0.232836	1.67835	0.084
231	0.498467		2.14118
14	0.502		2.15636
204	0.531746		2.28413
15	0.53802		2.31108
62	0.539395		2.31699
31	0.549663		2.36109
203	0.606358		2.60463
7	0.636124		2.73249
66	0.685388		2.94411
41	0.689271		2.96079
11	0.741144		3.18361
56	0.749278		3.21855
27	0.7555		3.24527
58	0.757633		3.25444
54	0.766013		3.29043
3	0.781019		3.35489
205	0.804753		3.45684
218	0.825716		3.54689
29	0.856366		3.67855
61	0.87148		3.74347
6	0.89129		3.82857
42	0.911476		3.91528
8	0.980439		4.21151
212	1.03936		4.4646
211	1.05327		4.52436
219	1.08762		4.67189
9	1.44236		6.19572	LR
70	1.5072		6.47425	LR
60	3.46092		14.8665	MR	delete

## Sheet: regions added
REGION		EC50
CZ	1	0.147565
CZ	2	0.226119
XT	3	0.781019
SJZ	4	0.189775
SJZ	5	0.204391
SJZ	6	0.89129
SJZ	7	0.636124
SJZ	8	0.980439
SJZ	9	1.44236
SJZ	11	0.741144
TS	13	0.0417114
HD	14	0.502043
HD	15	0.53802
HS	16	0.0990078
HS	17	0.119565
HS	18	0.139892
CZ	25	0.283154
CZ	26	0.174915
CZ	27	0.7555
CZ	29	0.856366
HD	31	0.549663
HD	32	0.278779
BD	33	0.334396
BD	34	0.324801
BD	35	0.138837
BD	36	0.232022
BD	37	0.279228
BD	38	0.29662
SJZ	39	0.0682438
SJZ	40	0.344949
SJZ	41	0.689271
SJZ	42	0.911476
XT	54	0.766013
XT	55	0.112965
XT	56	0.749278
SJZ	58	0.757633
SJZ	59	0.243378
SJZ	61	0.87148
SJZ	62	0.539395
SJZ	63	0.170239
TS	64	0.128567
TS	65	0.261215
TS	66	0.685388
TS	67	0.372865
TS	69	0.21629
TS	70	1.5072
HD	71	0.234078
HD	75	0.390719
HD	76	0.247429
HD	77	0.287172
SJZ	202	0.204966
SJZ	203	0.606358
SJZ	204	0.531746
SJZ	205	0.804753
SJZ	206	0.380776
SJZ	207	0.346782
SJZ	208	0.166626
SJZ	209	0.123135
SJZ	211	1.05327
SJZ	212	1.03936
SJZ	213	0.154984
SJZ	214	0.241804
SJZ	215	0.232101
SJZ	216	0.249657
SJZ	217	0.205793
CZ	218	0.825716
CZ	219	1.08762
XT	220	0.202695
XT	221	0.24443
XT	222	0.245382
LF	223	0.219761
LF	224	0.294749
LF	225	0.230475
LF	226	0.38486
LF	227	0.361263
LF	228	0.310208
LF	229	0.269232
HS	231	0.498467
HS	232	0.32959
HS	233	0.283402
HS	234	0.135227
CZ	235	0.21688
CZ	237	0.182329

## Sheet: screening ac regions
BD	33	0.334396		CZ	1	0.147565		HD	14	0.502043		HS	16	0.0990078
BD	34	0.324801		CZ	2	0.226119		HD	15	0.53802		HS	17	0.119565
BD	35	0.138837		CZ	25	0.283154		HD	31	0.549663		HS	18	0.139892
BD	36	0.232022		CZ	26	0.174915		HD	32	0.278779		HS	231	0.498467
BD	37	0.279228		CZ	27	0.7555		HD	71	0.234078		HS	232	0.32959
BD	38	0.29662	0.0728792	CZ	29	0.856366		HD	75	0.390719		HS	233	0.283402
		0.267651	2.40856	CZ	218	0.825716		HD	76	0.247429		HS	234	0.135227	0.147929
				CZ	219	1.08762		HD	77	0.287172	0.134418			0.229307	5.03462
				CZ	235	0.21688				0.378488	2.34821
				CZ	237	0.182329	0.360664
						0.475616	7.37041
LF	223	0.219761		SJZ	4	0.189775		TS	13	0.0417114		XT	3	0.781019
LF	224	0.294749		SJZ	5	0.204391		TS	64	0.128567		XT	54	0.766013
LF	225	0.230475		SJZ	6	0.89129		TS	65	0.261215		XT	55	0.112965
LF	226	0.38486		SJZ	7	0.636124		TS	66	0.685388		XT	56	0.749278
LF	227	0.361263		SJZ	8	0.980439		TS	67	0.372865		XT	220	0.202695
LF	228	0.310208		SJZ	9	1.44236		TS	69	0.21629		XT	221	0.24443
LF	229	0.269232	0.0621568	SJZ	11	0.741144		TS	70	1.5072	0.506417	XT	222	0.245382	0.304837
		0.295793	1.75127	SJZ	39	0.0682438				0.459034	36.1341			0.443112	6.91382
				SJZ	40	0.344949
				SJZ	41	0.689271
				SJZ	42	0.911476
				SJZ	58	0.757633
				SJZ	59	0.243378
				SJZ	61	0.87148
				SJZ	62	0.539395
				SJZ	63	0.170239
				SJZ	202	0.204966
				SJZ	203	0.606358
				SJZ	204	0.531746
				SJZ	205	0.804753
				SJZ	206	0.380776
				SJZ	207	0.346782
				SJZ	208	0.166626
				SJZ	209	0.123135
				SJZ	211	1.05327
				SJZ	212	1.03936
				SJZ	213	0.154984
				SJZ	214	0.241804
				SJZ	215	0.232101
				SJZ	216	0.249657
				SJZ	217	0.205793	0.3562
						0.516894	15.4339
